# Supplementary material for: Helicusin E, Isochromophilone X and Isochromophilone XI: New Chloroazaphilones Produced by the Fungus Bartalinia robillardoides Strain LF550
Source: PubMed Central journal article supplement (PMC3705371; doi:10.3390/md11030800), 2013-03-12

## Supplementary Information

|                                                                                                                                                |    |
|------------------------------------------------------------------------------------------------------------------------------------------------|----|
| <b>Figure S1.</b> <sup>1</sup> H-NMR of compound helicusin A ( <b>1</b> ) in MeOD- <i>d</i> <sub>4</sub> .                                     | 2  |
| <b>Figure S2.</b> <sup>1</sup> H-NMR of compound deacetylsclerotiorin ( <b>2</b> ) in CDCl <sub>3</sub> .                                      | 2  |
| <b>Figure S3.</b> HPLC-CD of compound deacetylsclerotiorin ( <b>2</b> ).                                                                       | 3  |
| <b>Figure S4.</b> <sup>1</sup> H-NMR of compound deacetylsclerotiorin ( <b>2</b> ) in CDCl <sub>3</sub> showing traces of the <i>Z</i> isomer. | 3  |
| <b>Figure S5.</b> <sup>1</sup> H-NMR of compound helicusin E ( <b>3</b> ) in MeOD- <i>d</i> <sub>4</sub> .                                     | 4  |
| <b>Figure S6.</b> <sup>1</sup> H-NMR of compound isochromophilone X ( <b>4</b> ) in MeOD- <i>d</i> <sub>4</sub> .                              | 4  |
| <b>Figure S7.</b> <sup>13</sup> C-NMR of compound isochromophilone X ( <b>4</b> ) in MeOD- <i>d</i> <sub>4</sub> .                             | 5  |
| <b>Figure S8.</b> COSY of compound isochromophilone X ( <b>4</b> ) in MeOD- <i>d</i> <sub>4</sub> .                                            | 5  |
| <b>Figure S9.</b> HSQC of compound isochromophilone X ( <b>4</b> ) in MeOD- <i>d</i> <sub>4</sub> .                                            | 6  |
| <b>Figure S10.</b> HMBC of compound isochromophilone X ( <b>4</b> ) in MeOD- <i>d</i> <sub>4</sub> .                                           | 6  |
| <b>Figure S11.</b> NOESY of compound isochromophilone X ( <b>4</b> ) in MeOD- <i>d</i> <sub>4</sub> .                                          | 7  |
| <b>Figure S12.</b> HPLC-CD of compound isochromophilone X ( <b>4</b> ).                                                                        | 8  |
| <b>Figure S13.</b> <sup>1</sup> H-NMR of compound isochromophilone XI ( <b>5</b> ) in MeOD- <i>d</i> <sub>4</sub> .                            | 9  |
| <b>Figure S14.</b> <sup>1</sup> H-NMR of compound bartanolide ( <b>6</b> ) in MeOD- <i>d</i> <sub>4</sub> .                                    | 9  |
| <b>Figure S15.</b> COSY of compound bartanolide ( <b>6</b> ) in MeOD- <i>d</i> <sub>4</sub> .                                                  | 10 |
| <b>Figure S16.</b> <sup>13</sup> C-NMR of compound bartanolide ( <b>6</b> ) in MeOD- <i>d</i> <sub>4</sub> .                                   | 10 |
| <b>Figure S17.</b> 135-DEPT of compound bartanolide ( <b>6</b> ) in MeOD- <i>d</i> <sub>4</sub> .                                              | 11 |
| <b>Figure S18.</b> HSQC of compound bartanolide ( <b>6</b> ) in MeOD- <i>d</i> <sub>4</sub> .                                                  | 11 |
| <b>Figure S19.</b> HMBC of compound bartanolide ( <b>6</b> ) in MeOD- <i>d</i> <sub>4</sub> .                                                  | 12 |
| <b>Figure S20.</b> Minimum Conformers of <i>S,R,R</i> - <b>6</b> and <i>R,R,R</i> - <b>6</b> .                                                 | 12 |
| <b>Figure S21.</b> NOESY of compound bartanolide ( <b>6</b> ) in MeOD- <i>d</i> <sub>4</sub> .                                                 | 13 |

**Figure S1.**  $^1\text{H-NMR}$  of compound helicisin A (1) in  $\text{MeOD-}d_4$ .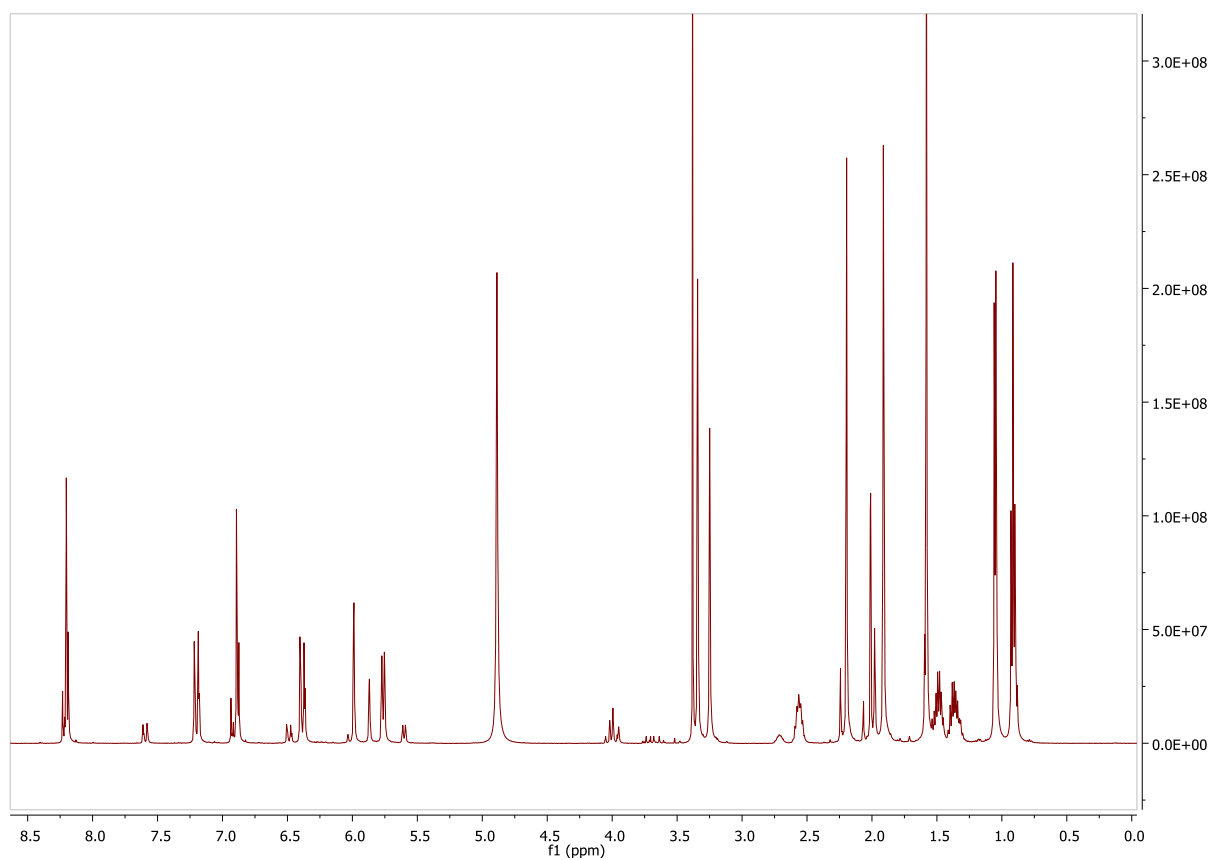**Figure S2.**  $^1\text{H-NMR}$  of compound deacetylsclerotiorin (2) in  $\text{CDCl}_3$ .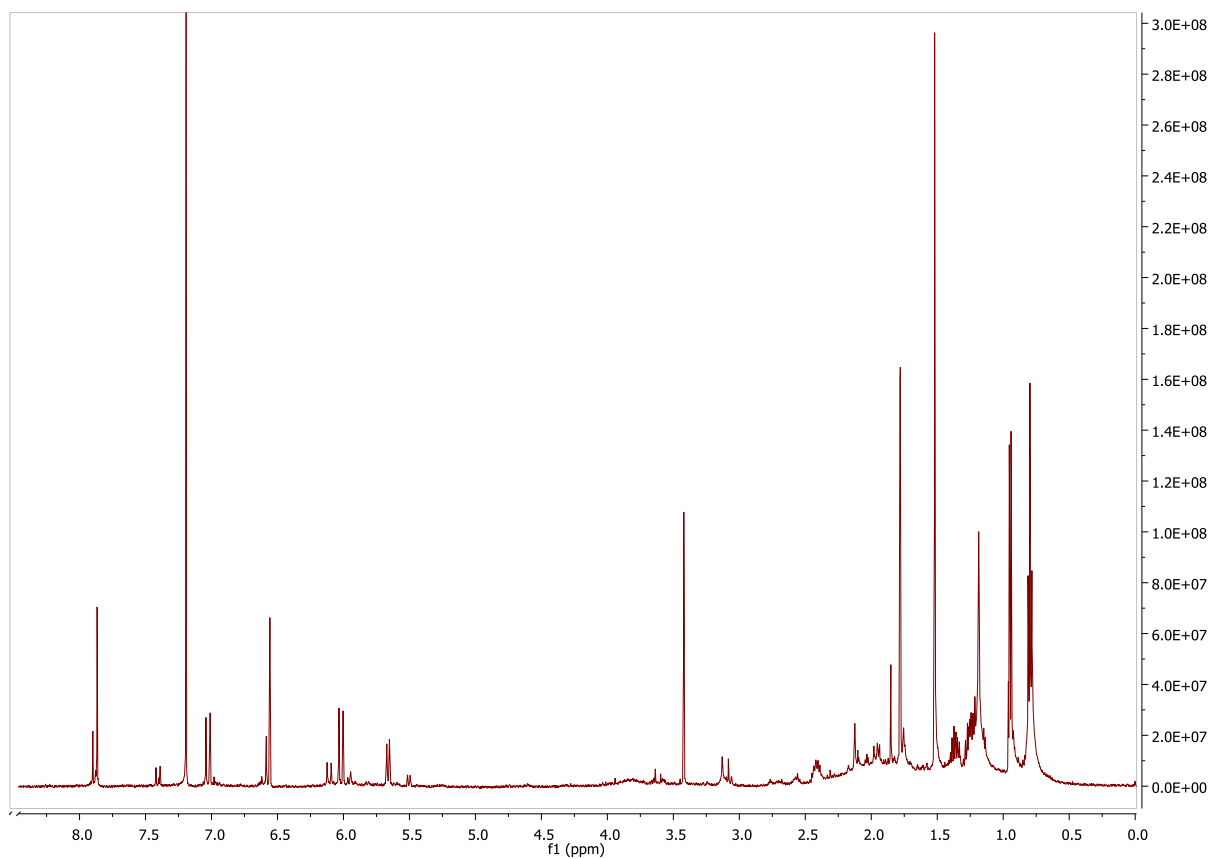



**Figure S5.**  $^1\text{H-NMR}$  of compound helicusin E (3) in  $\text{MeOD-}d_4$ .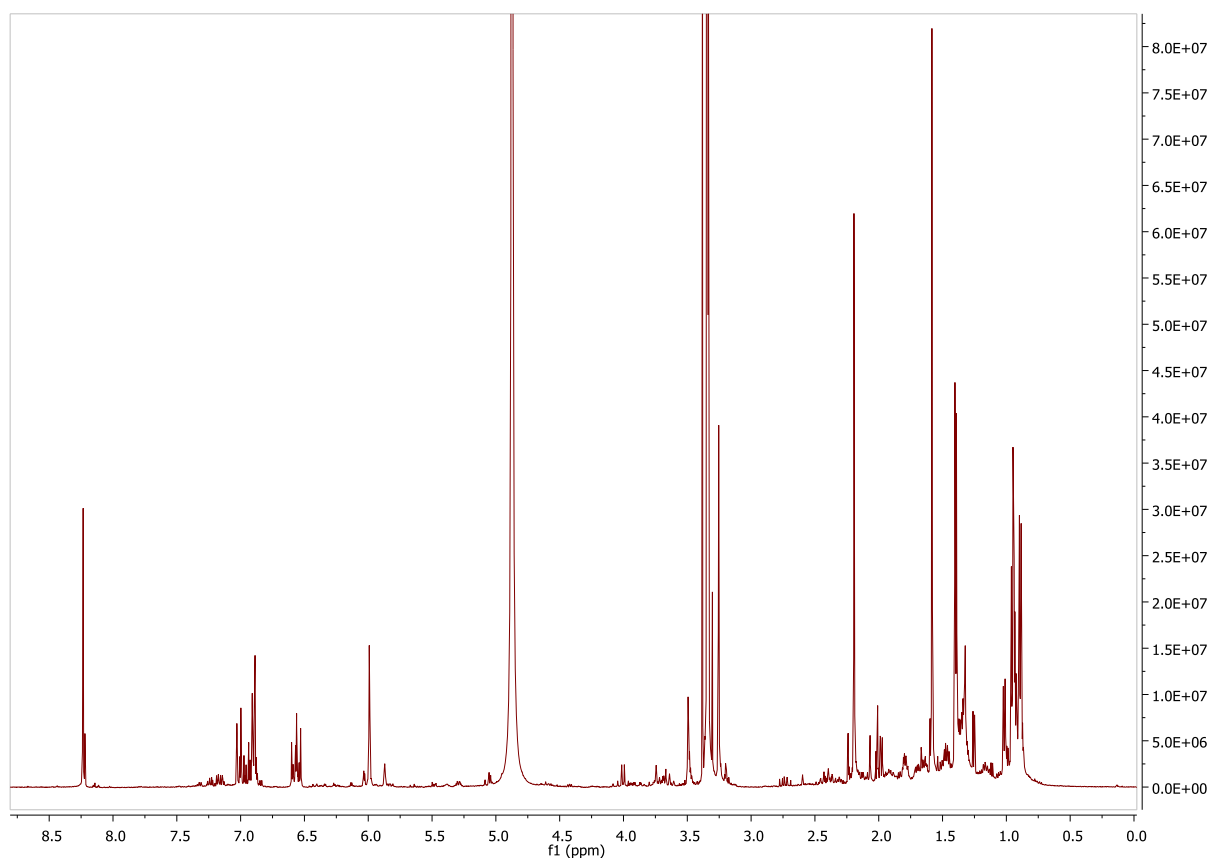**Figure S6.**  $^1\text{H-NMR}$  of compound isochromophilone X (4) in  $\text{MeOD-}d_4$ .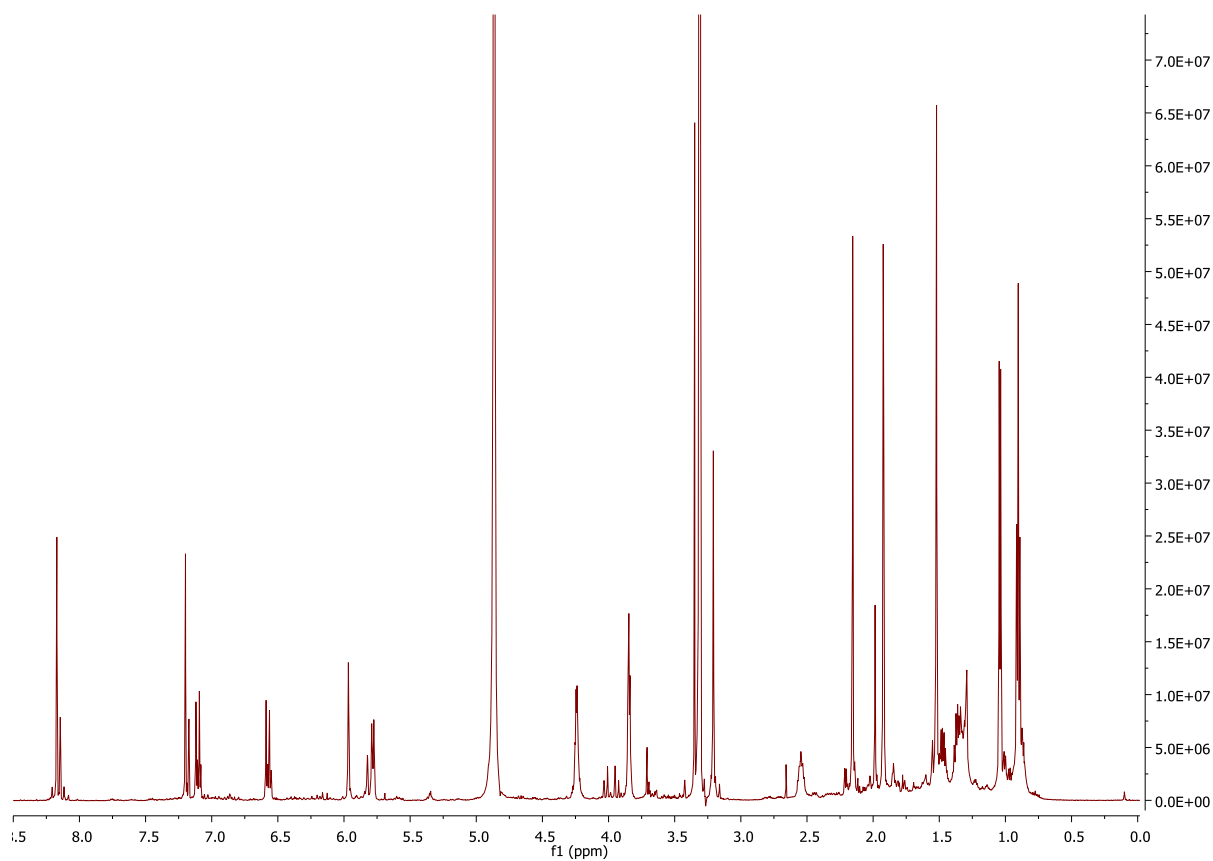

**Figure S7.**  $^{13}\text{C}$ -NMR of compound isochromophilone X (**4**) in  $\text{MeOD-}d_4$ .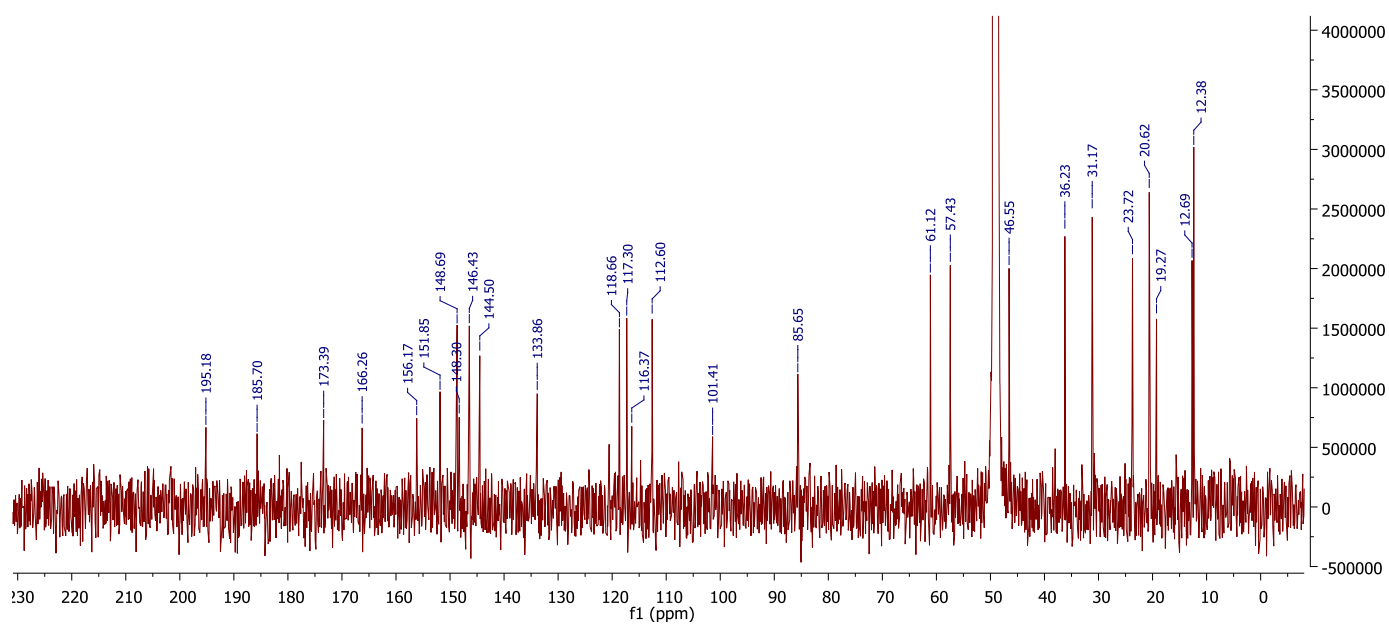**Figure S8.** COSY of compound isochromophilone X (**4**) in  $\text{MeOD-}d_4$ .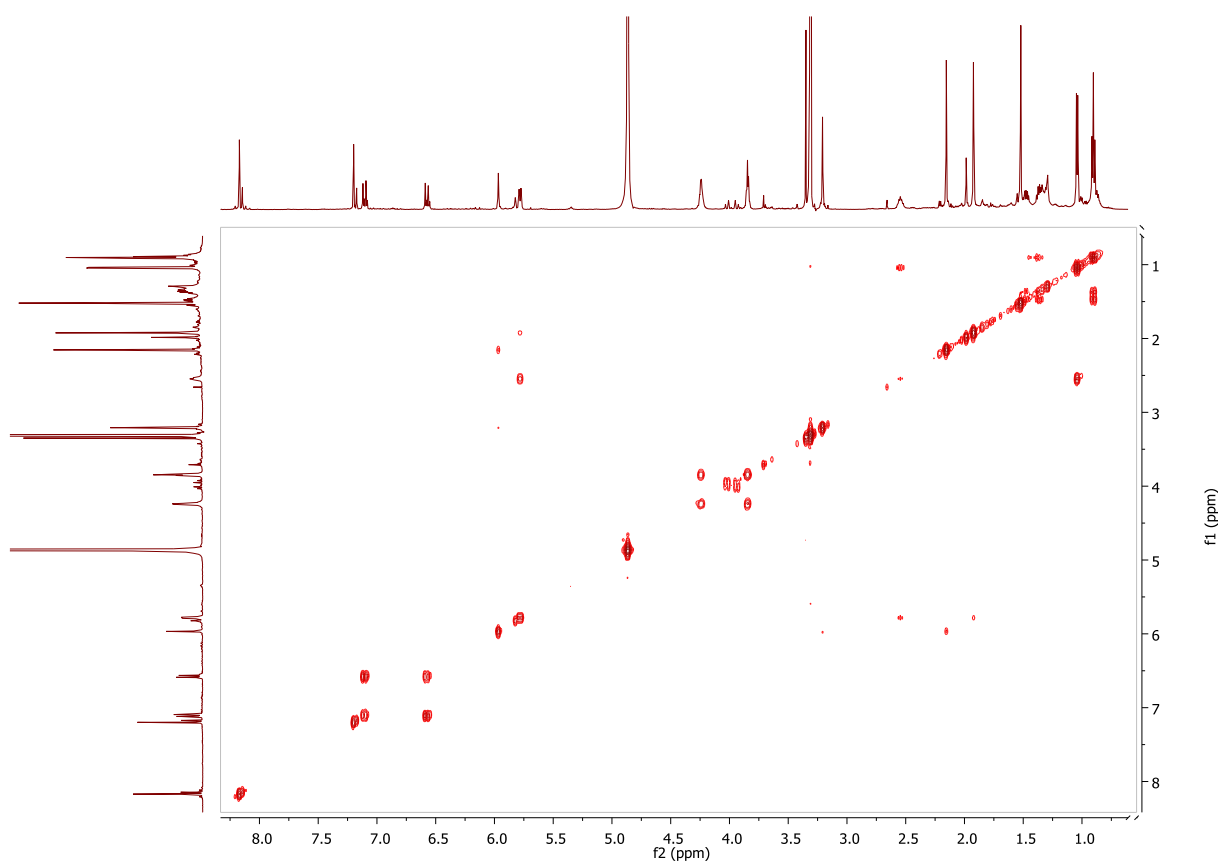

**Figure S9.** HSQC of compound isochromophilone X (4) in MeOD- $d_4$ .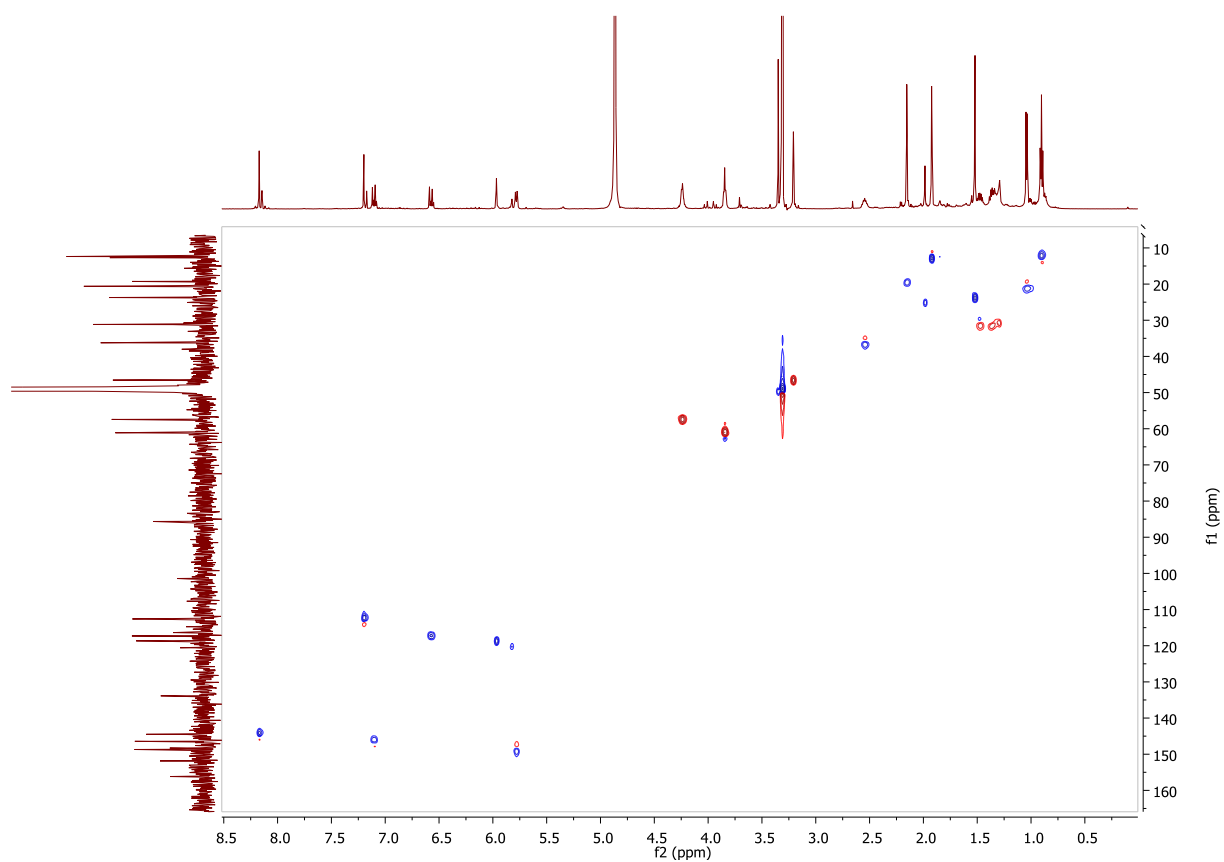**Figure S10.** HMBC of compound isochromophilone X (4) in MeOD- $d_4$ .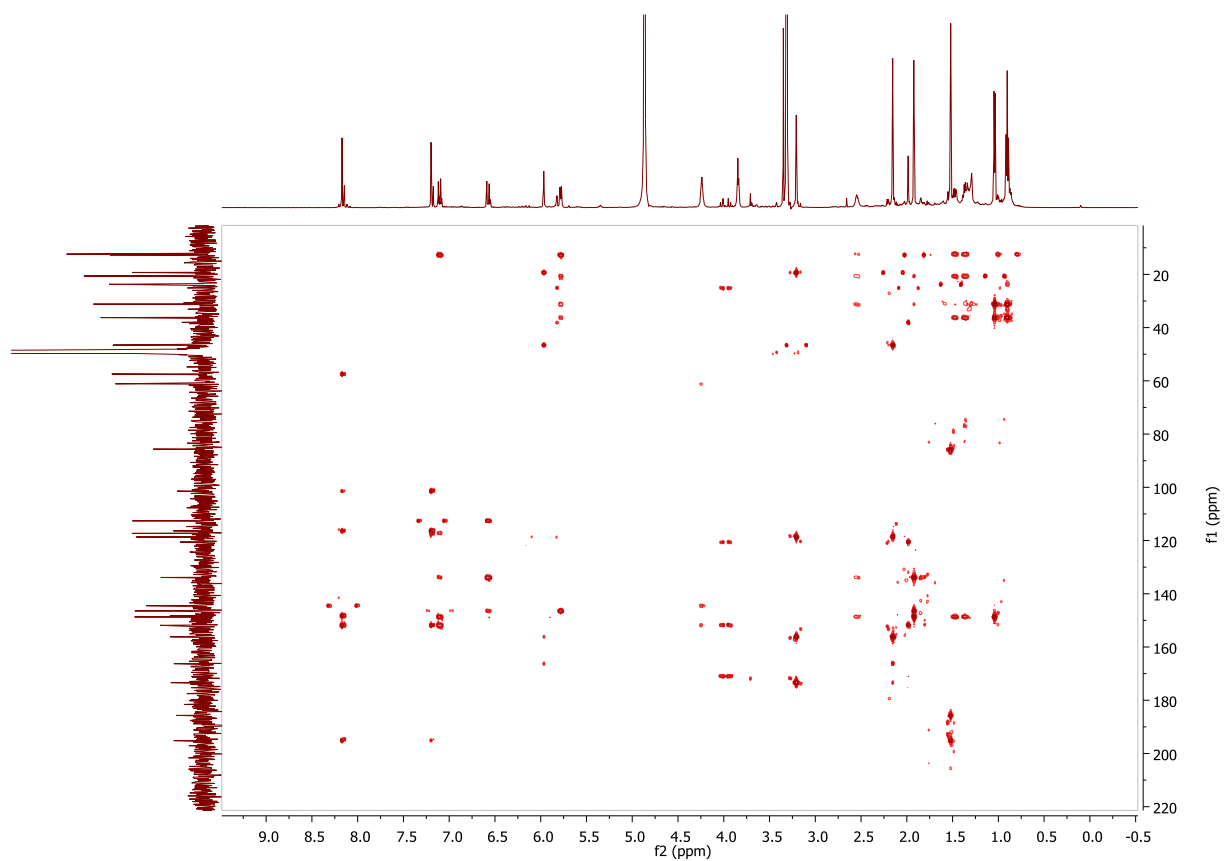

Figure S11. NOESY of compound isochromphilone X (4) in MeOD-*d*<sub>4</sub>.

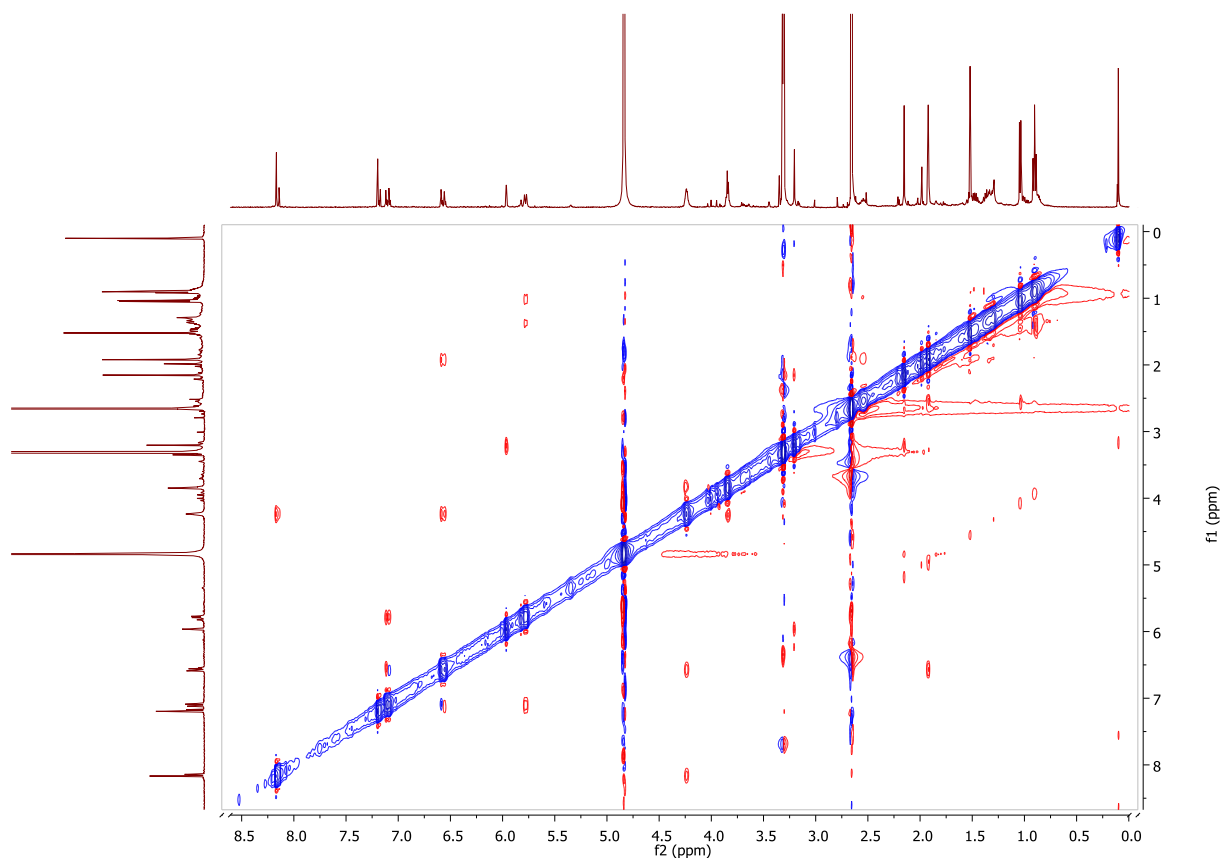

**Figure S12.** HPLC-CD of compound isochromophilone X (4).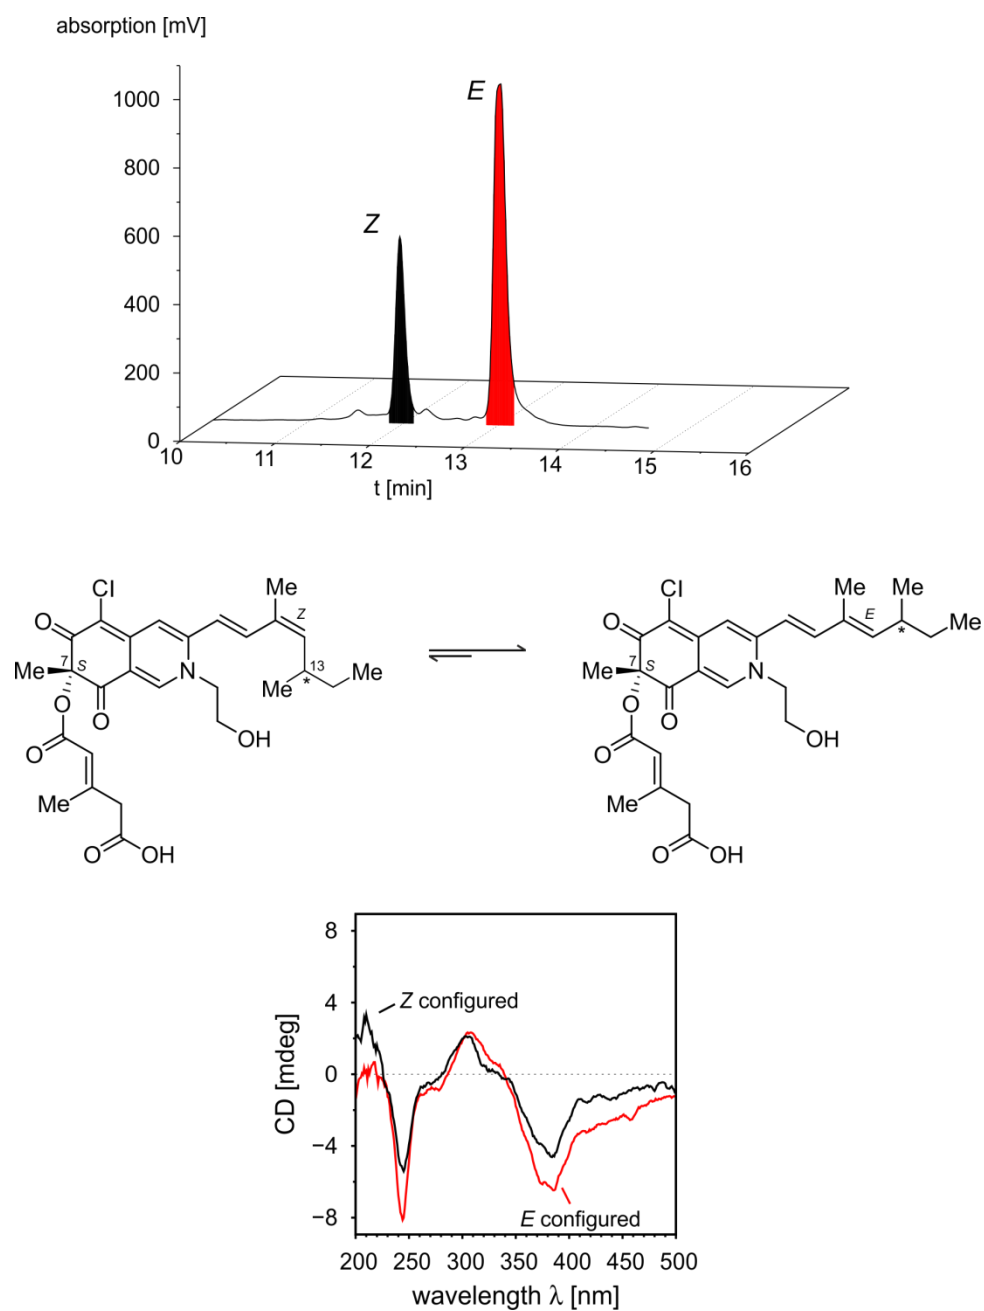



**Figure S13.**  $^1\text{H-NMR}$  of compound isochromophilone XI (**5**) in  $\text{MeOD-}d_4$ .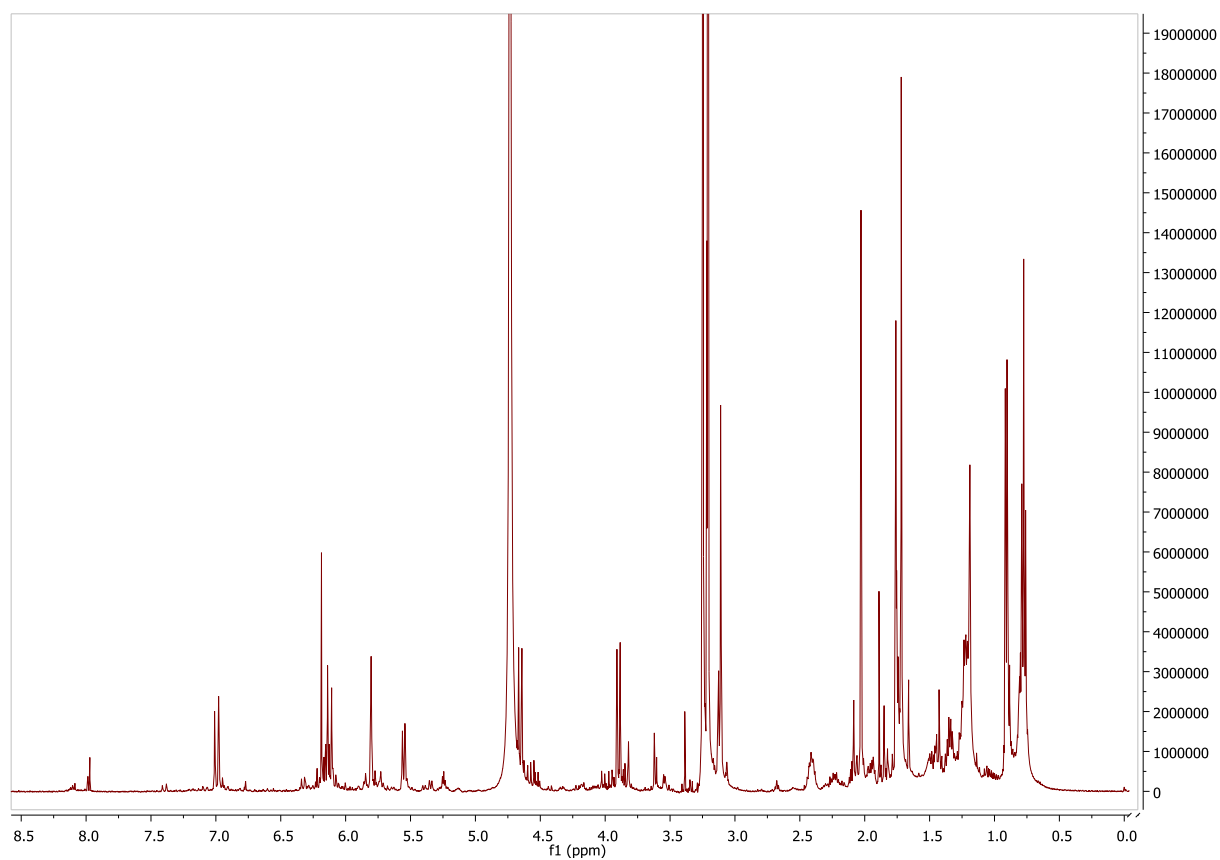**Figure S14.**  $^1\text{H-NMR}$  of compound bartanolide (**6**) in  $\text{MeOD-}d_4$ .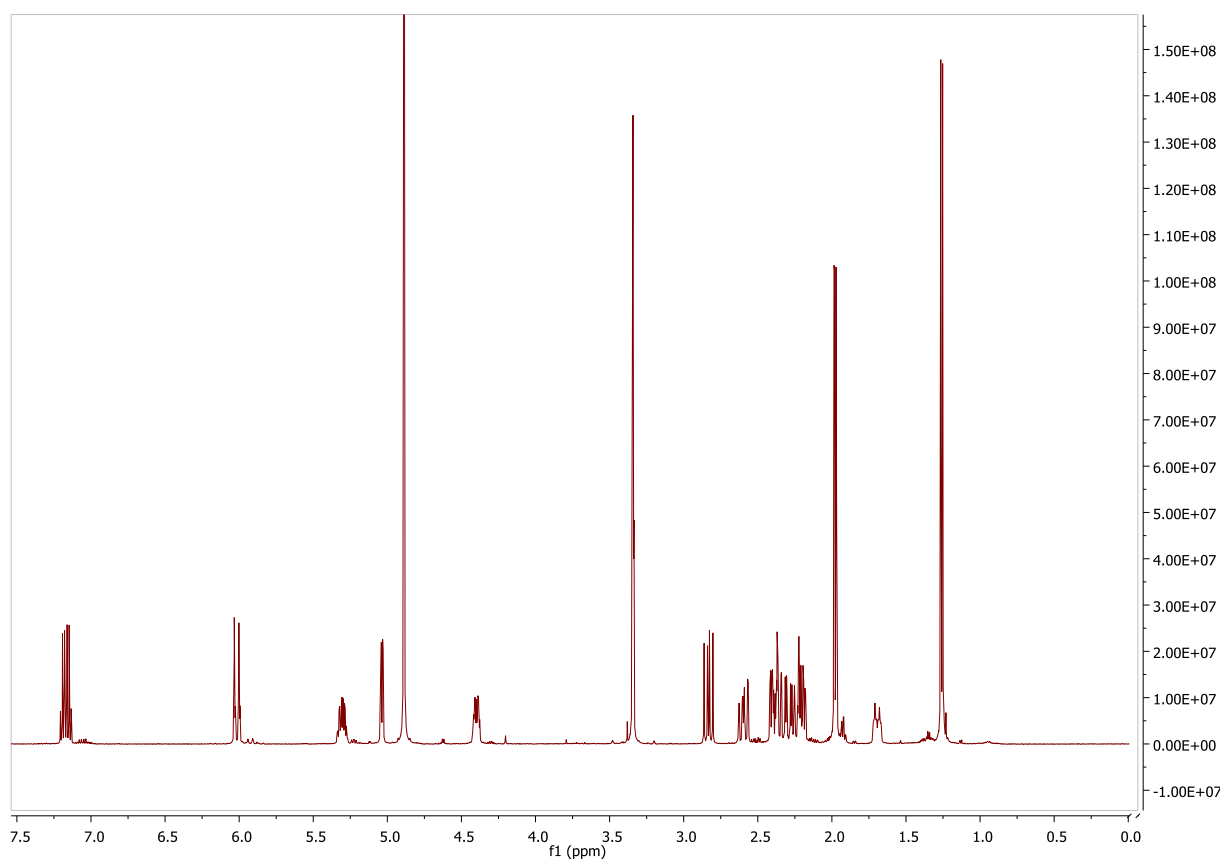

**Figure S15.** COSY of compound bartanolide (6) in MeOD- $d_4$ .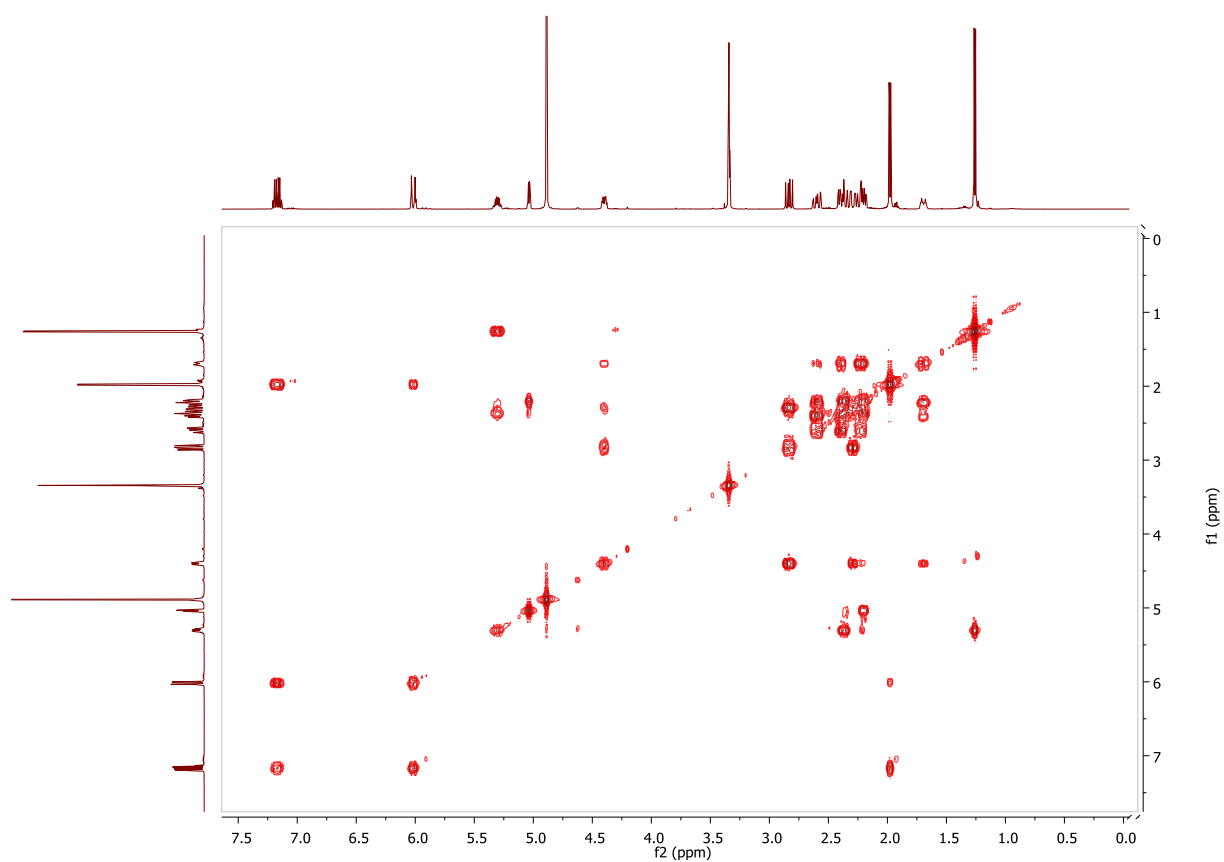**Figure S16.**  $^{13}\text{C}$ -NMR of compound bartanolide (6) in MeOD- $d_4$ .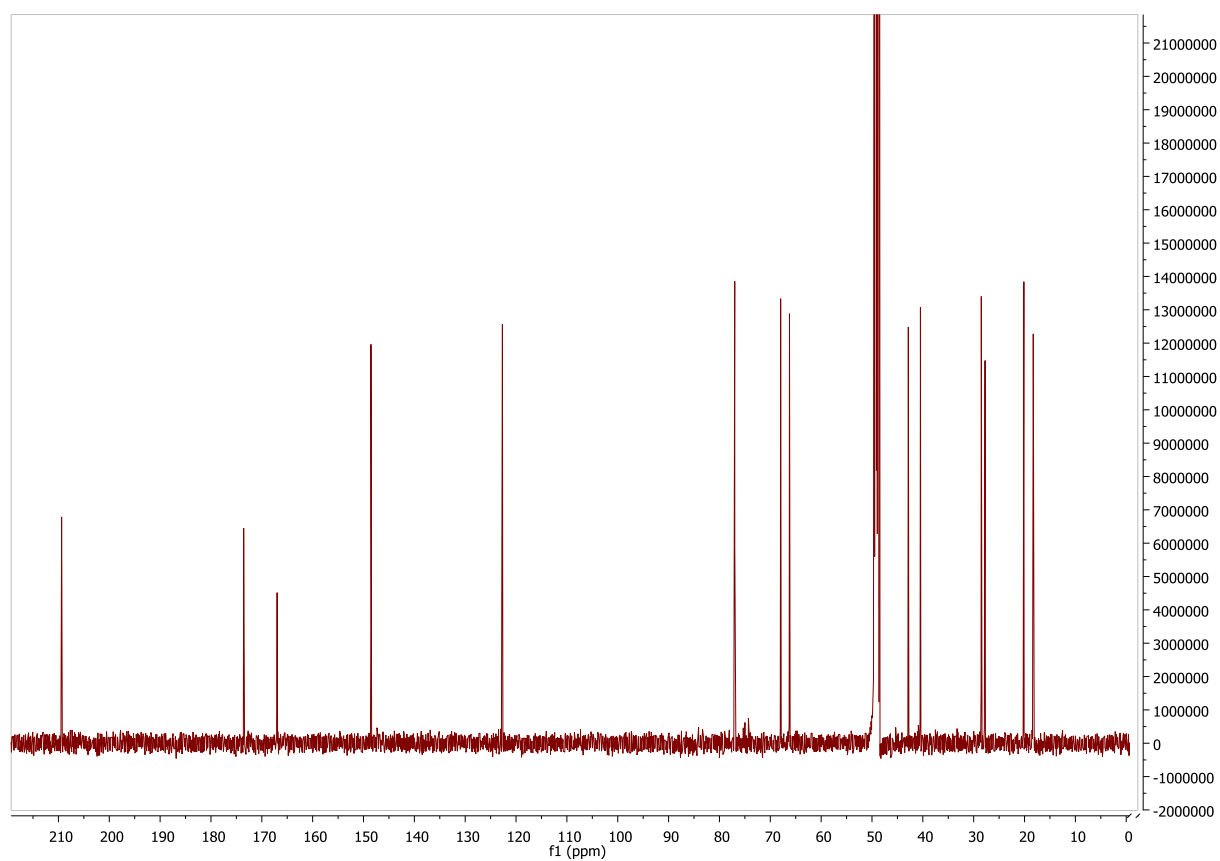

**Figure S17.** 135-DEPT of compound bartanolide (6) in MeOD-*d*<sub>4</sub>.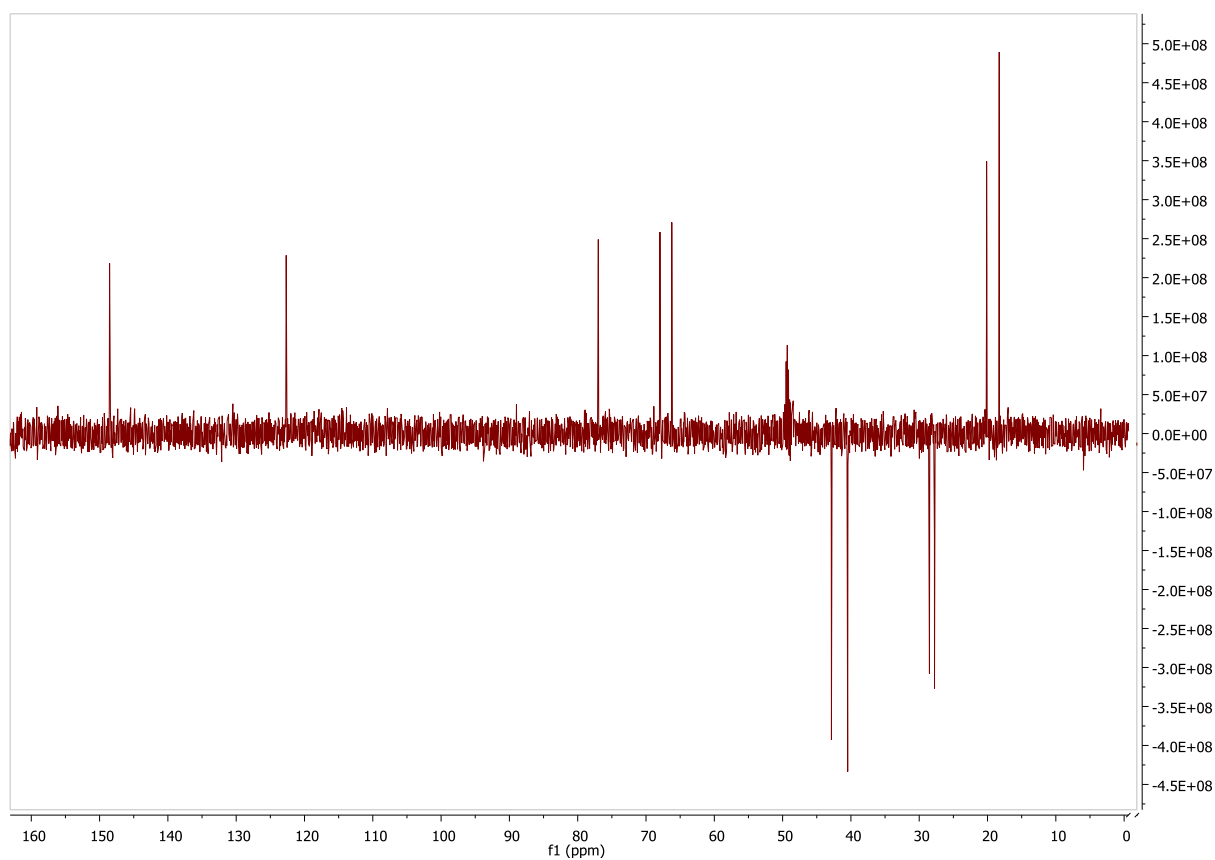**Figure S18.** HSQC of compound bartanolide (6) in MeOD-*d*<sub>4</sub>.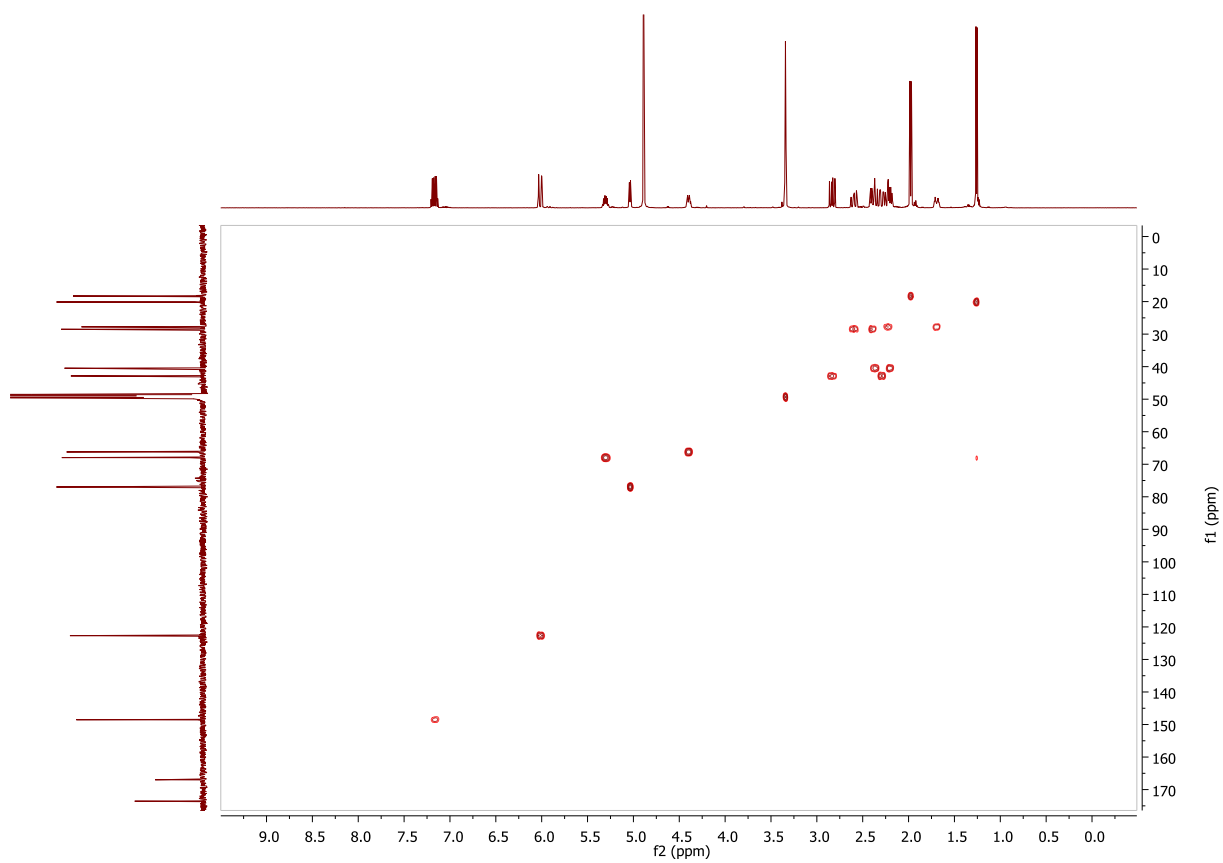

Figure S19. HMBC of compound bartanolide (6) in MeOD- $d_4$ .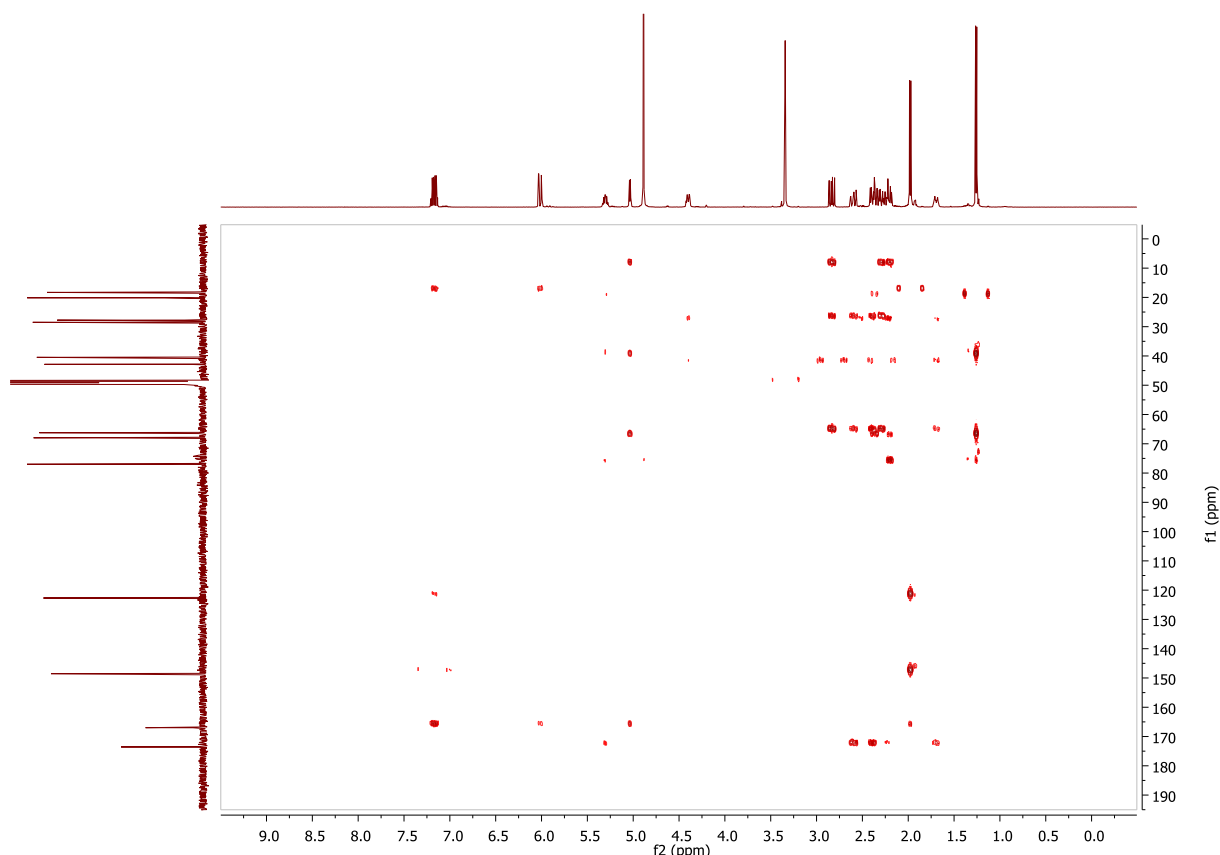Figure S20. Minimum Conformers of  $S,R,R$ -6 and  $R,R,R$ -6.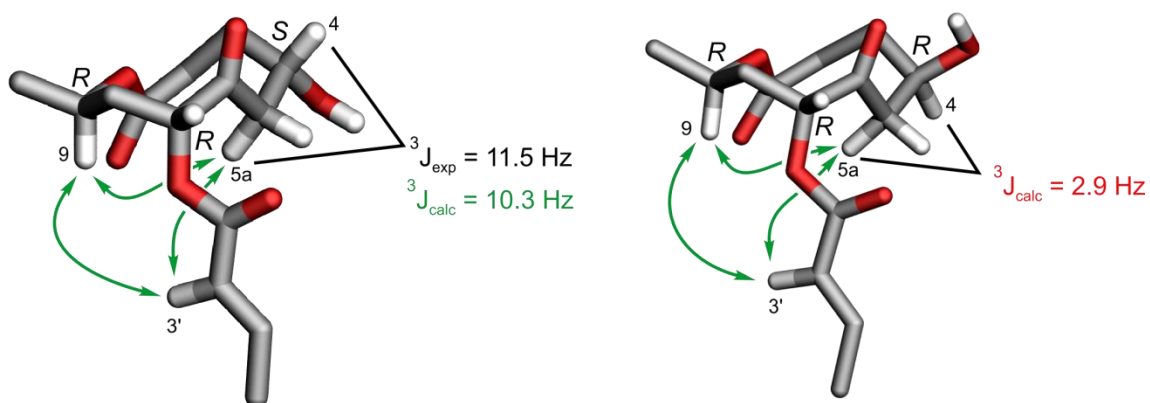

The found weak NOE between H-9 and H-5a and between H-9 and H-3' as well as the NOE between H-3' and H-5a were possible in the  $S,R,R$ - and the  $R,R,R$ -configurations (and in their enantiomers) of **6**. Conformational analyses with the B97D/TZVP method gave the minimum energy conformers shown above. Using the Karplus equation and NMR calculations (B3LYP/6-31G\*\*/B97D/TZVP, CPCM, solvent = methanol) of the  $^3J$  coupling between H-5a and H-4 it became clear that only the  $S,R,R$  configuration and its enantiomer fit to the experimental results.

**Figure S21.** NOESY of compound bartanolide (6) in MeOD-*d*<sub>4</sub>.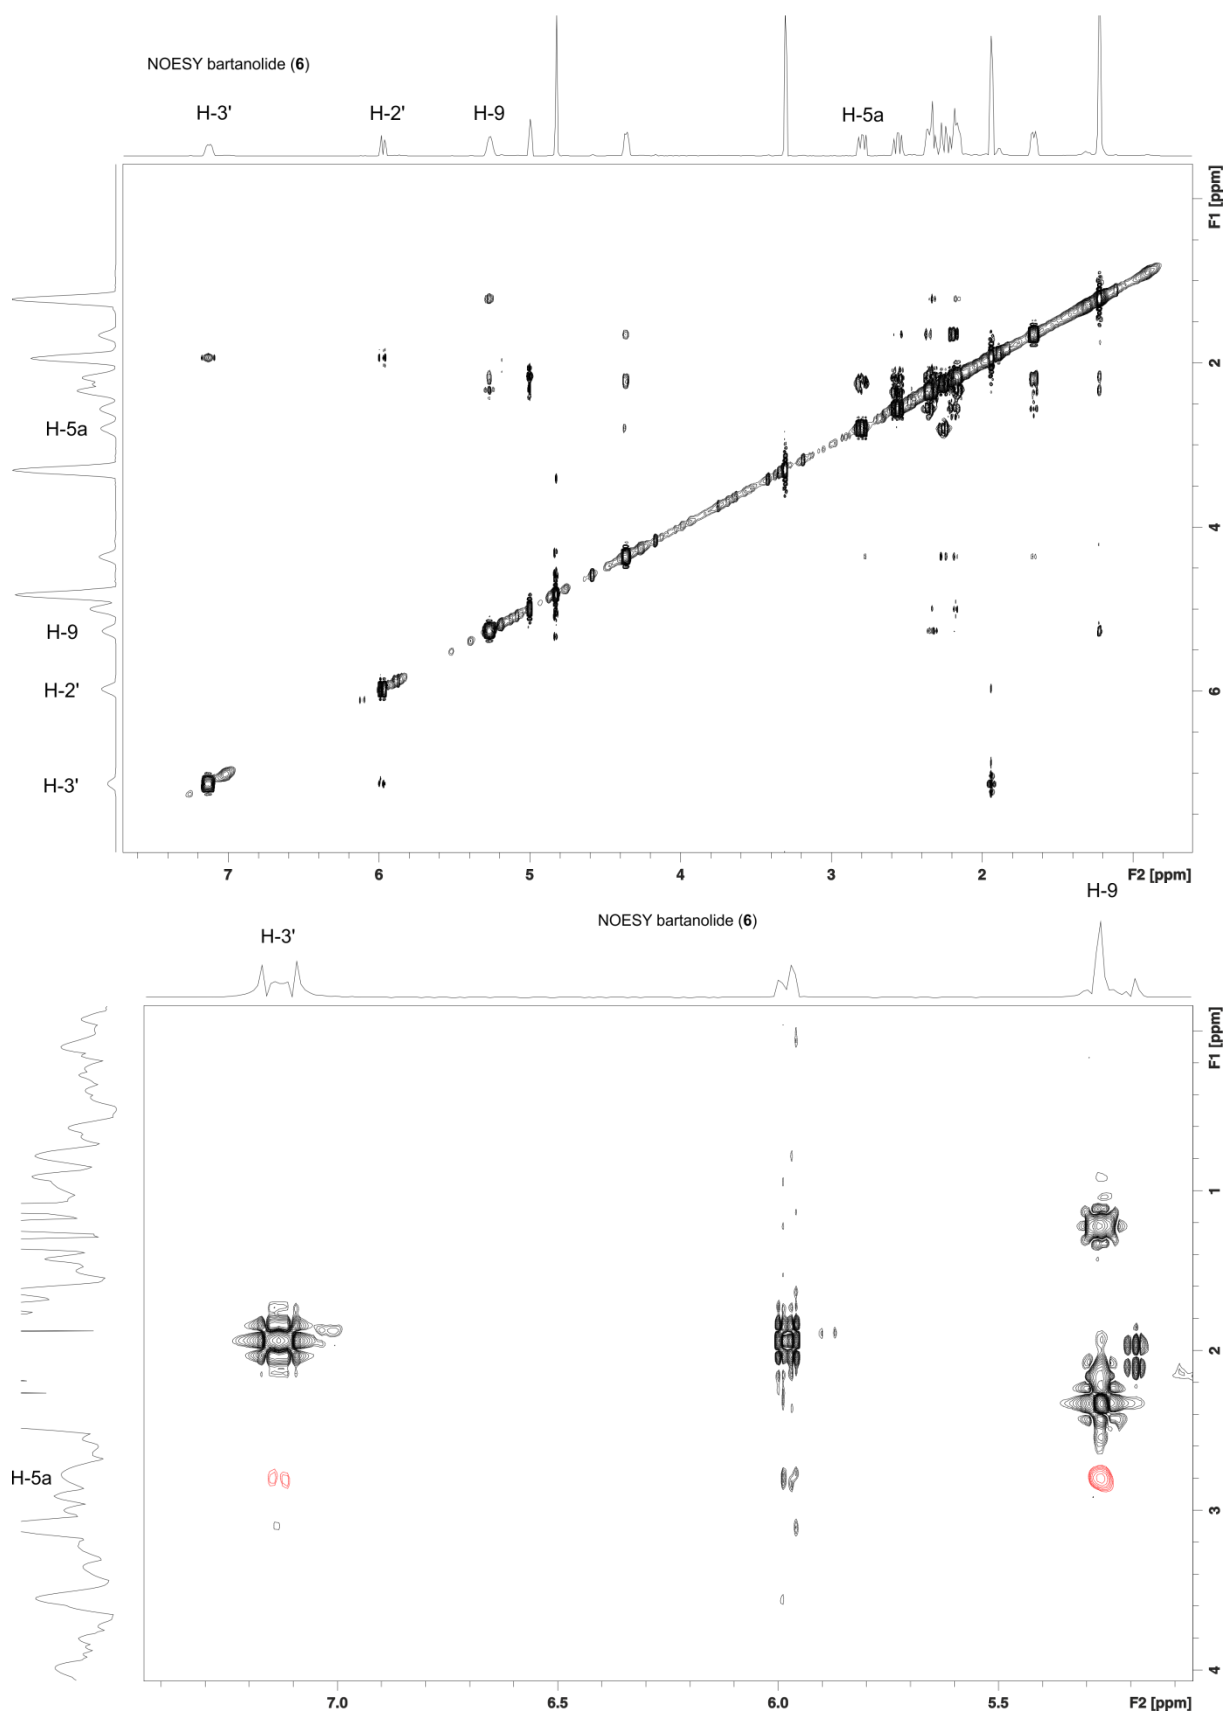

Figure S21. Cont.

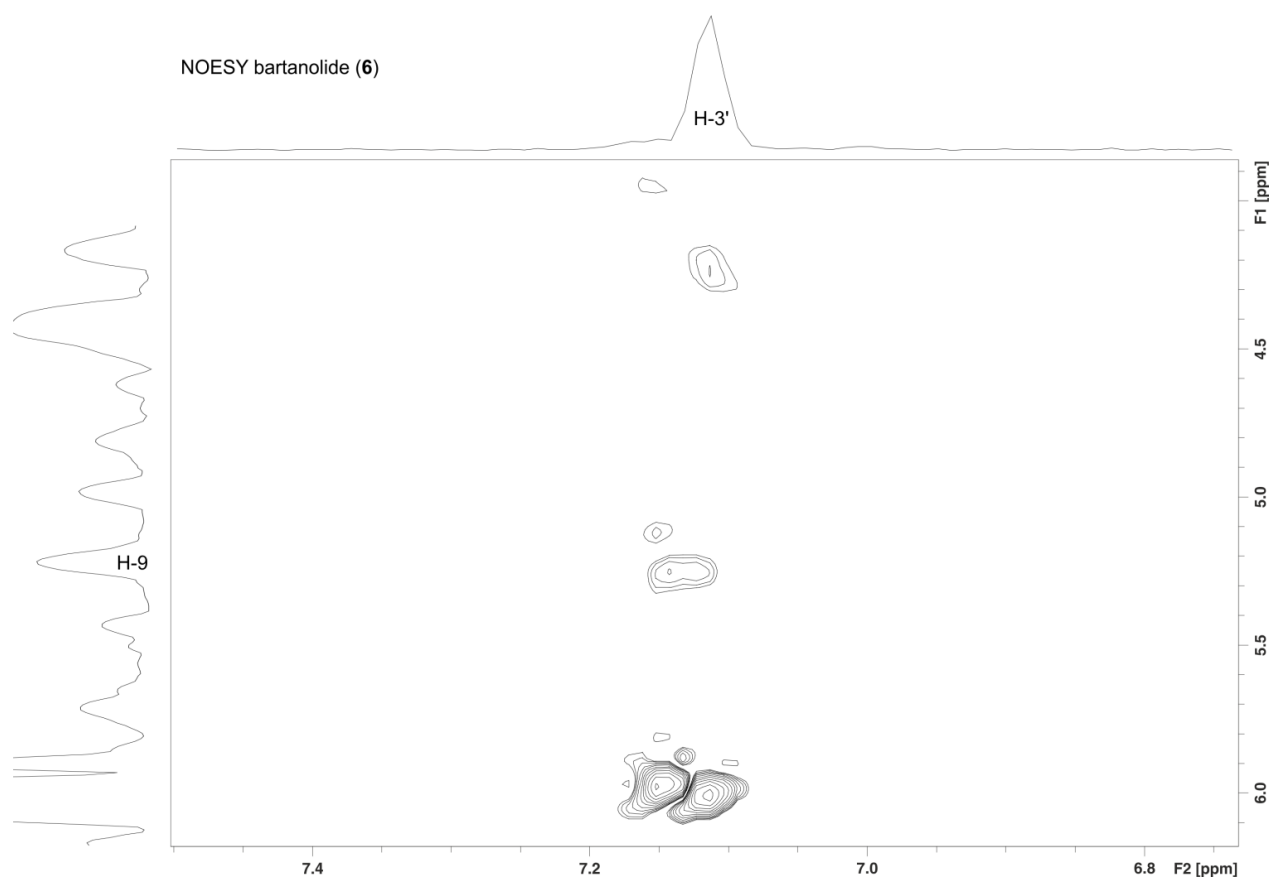

Supplement: marinedrugs-11-00800-s001.pdf [file marinedrugs-11-00800-s001.pdf]
