# Supplementary material for: Helicusin E, Isochromophilone X and Isochromophilone XI: New Chloroazaphilones Produced by the Fungus Bartalinia robillardoides Strain LF550
Source: MDPI journal article supplement (doi:10.3390/md11030800), 2013-03-12
Supplement: s2 [file s2]

marinedrugs-11-00800-s001.mol
  corina  04161405123D 1   1.00000     0.00000 
CORINA 3.49 0023  12.04.2013
 33 34  0  0  0  0  0  0  0  0999 V2000
   -0.4769    0.4169    1.7239 C   0  0  0  0  0  0  0  0  0  0  0  0
    0.1473   -0.9090    1.3884 C   0  0  0  0  0  0  0  0  0  0  0  0
    1.4459   -0.7030    0.6413 C   0  0  0  0  0  0  0  0  0  0  0  0
    2.2907    0.4239    1.0449 C   0  0  0  0  0  0  0  0  0  0  0  0
    1.6301    1.6010    1.6490 C   0  0  0  0  0  0  0  0  0  0  0  0
    0.2615    1.5666    1.8982 C   0  0  0  0  0  0  0  0  0  0  0  0
    3.6496    0.4360    0.8839 C   0  0  0  0  0  0  0  0  0  0  0  0
    4.3737    1.4990    1.2415 O   0  0  0  0  0  0  0  0  0  0  0  0
    3.7986    2.6023    1.7407 C   0  0  0  0  0  0  0  0  0  0  0  0
    2.4406    2.7074    1.9624 C   0  0  0  0  0  0  0  0  0  0  0  0
    5.9588    3.6417    1.8501 C   0  0  0  0  0  0  0  0  0  0  0  0
    4.6232    3.7117    2.0553 C   0  0  0  0  0  0  0  0  0  0  0  0
    8.1269    4.7174    1.9724 C   0  0  0  0  0  0  0  0  0  0  0  0
    6.8097    4.7865    2.1748 C   0  0  0  0  0  0  0  0  0  0  0  0
   10.0298    5.5694    3.3149 C   0  0  0  0  0  0  0  0  0  0  0  0
    8.9950    5.9191    2.2436 C   0  0  0  0  0  0  0  0  0  0  0  0
   -0.7672   -1.6752    0.5607 O   0  0  0  0  0  0  0  0  0  0  0  0
   -1.9739   -1.9638    1.0876 C   0  0  0  0  0  0  0  0  0  0  0  0
   -2.2540   -1.5854    2.2081 O   0  0  0  0  0  0  0  0  0  0  0  0
   -4.0877   -3.1350    0.8722 C   0  0  0  0  0  0  0  0  0  0  0  0
   -2.9507   -2.7360    0.3072 C   0  0  0  0  0  0  0  0  0  0  0  0
   -4.1473   -5.7716    0.7478 O   0  0  0  0  0  0  0  0  0  0  0  0
   -5.0283   -5.2704    0.0902 C   0  0  0  0  0  0  0  0  0  0  0  0
   -5.1645   -3.7707    0.0312 C   0  0  0  0  0  0  0  0  0  0  0  0
   -5.8858   -6.0494   -0.5877 O   0  0  0  0  0  0  0  0  0  0  0  0
    1.7767   -1.4450   -0.2603 O   0  0  0  0  0  0  0  0  0  0  0  0
   -1.6882    0.4782    1.8419 O   0  0  0  0  0  0  0  0  0  0  0  0
   -0.5356    3.0095    2.4424 Cl  0  0  0  0  0  0  0  0  0  0  0  0
    9.7125    6.3308    0.9566 C   0  0  0  0  0  0  0  0  0  0  0  0
    6.1987    6.0438    2.7377 C   0  0  0  0  0  0  0  0  0  0  0  0
    0.4231   -1.6805    2.6805 C   0  0  0  0  0  0  0  0  0  0  0  0
   -4.2983   -2.9512    2.3531 C   0  0  0  0  0  0  0  0  0  0  0  0
   10.8291    6.8219    3.6801 C   0  0  0  0  0  0  0  0  0  0  0  0
  1  2  1  0      
  2  3  1  0      
  3  4  1  0      
  4  5  1  0      
  5  6  2  0      
  6  1  1  0      
  4  7  2  0      
  7  8  1  0      
  8  9  1  0      
  9 10  2  0      
 10  5  1  0      
 11 12  2  0      
 12  9  1  0      
 13 14  2  0      
 14 11  1  0      
 15 16  1  0      
 16 13  1  0      
  2 17  1  0      
 17 18  1  0      
 18 19  2  0      
 20 21  2  0      
 21 18  1  0      
 22 23  2  0      
 23 24  1  0      
 24 20  1  0      
 23 25  1  0      
  3 26  2  0      
  1 27  2  0      
  6 28  1  0      
 16 29  1  0      
 14 30  1  0      
  2 31  1  0      
 20 32  1  0      
 15 33  1  0      
M  STY  1   1 SUP
M  SLB  1   1   1
M  SAL   1  1  29
M  SBL   1  1  30
M  SMT   1 Me
M  SBV   1 30   -7.4548    8.5866
M  STY  1   2 SUP
M  SLB  1   2   2
M  SAL   2  1  30
M  SBL   2  1  31
M  SMT   2 Me
M  SBV   2 31   -7.4545    8.5866
M  STY  1   3 SUP
M  SLB  1   3   3
M  SAL   3  1  31
M  SBL   3  1  32
M  SMT   3 Me
M  SBV   3 32   -8.2790    7.7616
M  STY  1   4 SUP
M  SLB  1   4   4
M  SAL   4  1  32
M  SBL   4  1  33
M  SMT   4 Me
M  SBV   4 33   -8.1681    7.3498
M  STY  1   5 SUP
M  SLB  1   5   5
M  SAL   5  1  33
M  SBL   5  1  34
M  SMT   5 Me
M  SBV   5 34   -6.7393    8.1741
M  END
$$$$
