# Supplementary material for: Helicusin E, Isochromophilone X and Isochromophilone XI: New Chloroazaphilones Produced by the Fungus Bartalinia robillardoides Strain LF550
Source: MDPI journal article supplement (doi:10.3390/md11030800), 2013-03-12
Supplement: s3 [file s3]

marinedrugs-11-00800-s001.mol
  ChemDraw03251423422D

 33 34  0  0  0  0  0  0  0  0999 V2000
   -3.4655    2.0484    0.0000 C   0  0  0  0  0  0  0  0  0  0  0  0
   -3.4655    1.2234    0.0000 C   0  0  0  0  0  0  0  0  0  0  0  0
   -2.7510    0.8109    0.0000 C   0  0  0  0  0  0  0  0  0  0  0  0
   -2.0365    1.2234    0.0000 C   0  0  0  0  0  0  0  0  0  0  0  0
   -2.0365    2.0484    0.0000 C   0  0  0  0  0  0  0  0  0  0  0  0
   -2.7510    2.4609    0.0000 C   0  0  0  0  0  0  0  0  0  0  0  0
   -1.3221    0.8109    0.0000 C   0  0  0  0  0  0  0  0  0  0  0  0
   -0.6076    1.2234    0.0000 O   0  0  0  0  0  0  0  0  0  0  0  0
   -0.6076    2.0484    0.0000 C   0  0  0  0  0  0  0  0  0  0  0  0
   -1.3221    2.4609    0.0000 C   0  0  0  0  0  0  0  0  0  0  0  0
    0.8213    2.0484    0.0000 C   0  0  0  0  0  0  0  0  0  0  0  0
    0.1069    2.4609    0.0000 C   0  0  0  0  0  0  0  0  0  0  0  0
    2.2503    2.0484    0.0000 C   0  0  0  0  0  0  0  0  0  0  0  0
    1.5358    2.4609    0.0000 C   0  0  0  0  0  0  0  0  0  0  0  0
    3.6792    2.0484    0.0000 C   0  0  0  0  0  0  0  0  0  0  0  0
    2.9648    2.4609    0.0000 C   0  0  0  0  0  0  0  0  0  0  0  0
   -3.6790    0.4266    0.0000 O   0  0  0  0  0  0  0  0  0  0  0  0
   -3.6790   -0.3984    0.0000 C   0  0  0  0  0  0  0  0  0  0  0  0
   -4.3935   -0.8109    0.0000 O   0  0  0  0  0  0  0  0  0  0  0  0
   -2.9645   -1.6359    0.0000 C   0  0  0  0  0  0  0  0  0  0  0  0
   -2.9645   -0.8109    0.0000 C   0  0  0  0  0  0  0  0  0  0  0  0
   -2.9645   -3.2859    0.0000 O   0  0  0  0  0  0  0  0  0  0  0  0
   -2.2501   -2.8734    0.0000 C   0  0  0  0  0  0  0  0  0  0  0  0
   -2.2501   -2.0484    0.0000 C   0  0  0  0  0  0  0  0  0  0  0  0
   -1.5356   -3.2859    0.0000 O   0  0  0  0  0  0  0  0  0  0  0  0
   -2.7510   -0.0141    0.0000 O   0  0  0  0  0  0  0  0  0  0  0  0
   -4.1800    2.4609    0.0000 O   0  0  0  0  0  0  0  0  0  0  0  0
   -2.7510    3.2859    0.0000 Cl  0  0  0  0  0  0  0  0  0  0  0  0
    2.9635    3.2859    0.0000 C   0  0  0  0  0  0  0  0  0  0  0  0
    1.5349    3.2859    0.0000 C   0  0  0  0  0  0  0  0  0  0  0  0
   -4.2910    1.2234    0.0000 C   0  0  0  0  0  0  0  0  0  0  0  0
   -3.6791   -2.0477    0.0000 C   0  0  0  0  0  0  0  0  0  0  0  0
    4.3935    2.4609    0.0000 C   0  0  0  0  0  0  0  0  0  0  0  0
  1  2  1  0      
  2  3  1  0      
  3  4  1  0      
  4  5  1  0      
  5  6  2  0      
  6  1  1  0      
  4  7  2  0      
  7  8  1  0      
  8  9  1  0      
  9 10  2  0      
 10  5  1  0      
 11 12  2  0      
 12  9  1  0      
 13 14  2  0      
 14 11  1  0      
 15 16  1  0      
 16 13  1  0      
  2 17  1  6      
 17 18  1  0      
 18 19  2  0      
 20 21  2  0      
 21 18  1  0      
 22 23  2  0      
 23 24  1  0      
 24 20  1  0      
 23 25  1  0      
  3 26  2  0      
  1 27  2  0      
  6 28  1  0      
 16 29  1  0      
 14 30  1  0      
  2 31  1  1      
 20 32  1  0      
 15 33  1  0      
M  STY  1   1 SUP
M  SLB  1   1   1
M  SAL   1  1  29
M  SBL   1  1  30
M  SMT   1 Me
M  SBV   1 30   -7.4548    8.5866
M  STY  1   2 SUP
M  SLB  1   2   2
M  SAL   2  1  30
M  SBL   2  1  31
M  SMT   2 Me
M  SBV   2 31   -7.4545    8.5866
M  STY  1   3 SUP
M  SLB  1   3   3
M  SAL   3  1  31
M  SBL   3  1  32
M  SMT   3 Me
M  SBV   3 32   -8.2790    7.7616
M  STY  1   4 SUP
M  SLB  1   4   4
M  SAL   4  1  32
M  SBL   4  1  33
M  SMT   4 Me
M  SBV   4 33   -8.1681    7.3498
M  STY  1   5 SUP
M  SLB  1   5   5
M  SAL   5  1  33
M  SBL   5  1  34
M  SMT   5 Me
M  SBV   5 34   -6.7393    8.1741
M  END
