# Supplementary material for: Helicusin E, Isochromophilone X and Isochromophilone XI: New Chloroazaphilones Produced by the Fungus Bartalinia robillardoides Strain LF550
Source: MDPI journal article supplement (doi:10.3390/md11030800), 2013-03-12
Supplement: s4 [file s4]

marinedrugs-11-00800-s002.mol
  corina  04161405133D 1   1.00000     0.00000 
CORINA 3.49 0023  12.04.2013
 24 25  0  0  0  0  0  0  0  0999 V2000
    0.1644    1.0084    1.7390 C   0  0  0  0  0  0  0  0  0  0  0  0
    0.2011   -0.4457    1.3592 C   0  0  0  0  0  0  0  0  0  0  0  0
    1.2915   -0.6943    0.3413 C   0  0  0  0  0  0  0  0  0  0  0  0
    2.5407    0.0573    0.4864 C   0  0  0  0  0  0  0  0  0  0  0  0
    2.4787    1.3800    1.1449 C   0  0  0  0  0  0  0  0  0  0  0  0
    1.2738    1.8229    1.6818 C   0  0  0  0  0  0  0  0  0  0  0  0
    3.7485   -0.4048    0.0389 C   0  0  0  0  0  0  0  0  0  0  0  0
    4.8555    0.3302    0.1688 O   0  0  0  0  0  0  0  0  0  0  0  0
    4.8228    1.5557    0.7113 C   0  0  0  0  0  0  0  0  0  0  0  0
    3.6696    2.1261    1.2106 C   0  0  0  0  0  0  0  0  0  0  0  0
    7.1762    1.7697    0.2943 C   0  0  0  0  0  0  0  0  0  0  0  0
    6.0278    2.2996    0.7749 C   0  0  0  0  0  0  0  0  0  0  0  0
    9.5524    2.0147   -0.1140 C   0  0  0  0  0  0  0  0  0  0  0  0
    8.4197    2.5374    0.3600 C   0  0  0  0  0  0  0  0  0  0  0  0
   11.8430    2.2751    0.7994 C   0  0  0  0  0  0  0  0  0  0  0  0
   10.8048    2.8514   -0.1654 C   0  0  0  0  0  0  0  0  0  0  0  0
   -1.0604   -0.8213    0.8026 O   0  0  0  0  0  0  0  0  0  0  0  0
    1.1374   -1.4884   -0.5634 O   0  0  0  0  0  0  0  0  0  0  0  0
   -0.8931    1.4882    2.1086 O   0  0  0  0  0  0  0  0  0  0  0  0
    1.1659    3.4434    2.2950 Cl  0  0  0  0  0  0  0  0  0  0  0  0
    0.4713   -1.2886    2.6071 C   0  0  0  0  0  0  0  0  0  0  0  0
   11.3683    2.8392   -1.5878 C   0  0  0  0  0  0  0  0  0  0  0  0
   13.0660    3.1936    0.8407 C   0  0  0  0  0  0  0  0  0  0  0  0
    8.4217    3.9185    0.9630 C   0  0  0  0  0  0  0  0  0  0  0  0
  1  2  1  0      
  2  3  1  0      
  3  4  1  0      
  4  5  1  0      
  5  6  2  0      
  6  1  1  0      
  4  7  2  0      
  7  8  1  0      
  8  9  1  0      
  9 10  2  0      
 10  5  1  0      
 11 12  2  0      
 12  9  1  0      
 13 14  2  0      
 14 11  1  0      
 15 16  1  0      
 16 13  1  0      
  2 17  1  0      
  3 18  2  0      
  1 19  2  0      
  6 20  1  0      
  2 21  1  0      
 16 22  1  0      
 15 23  1  0      
 14 24  1  0      
M  STY  1   1 SUP
M  SLB  1   1   1
M  SAL   1  1  21
M  SBL   1  1  22
M  SMT   1 Me
M  SBV   1 22   -8.1240    4.9706
M  STY  1   2 SUP
M  SLB  1   2   2
M  SAL   2  1  22
M  SBL   2  1  23
M  SMT   2 Me
M  SBV   2 23   -7.2998    5.7956
M  STY  1   3 SUP
M  SLB  1   3   3
M  SAL   3  1  23
M  SBL   3  1  24
M  SMT   3 Me
M  SBV   3 24   -6.5842    5.3831
M  STY  1   4 SUP
M  SLB  1   4   4
M  SAL   4  1  24
M  SBL   4  1  25
M  SMT   4 Me
M  SBV   4 25   -7.2995    5.7956
M  END
$$$$
