# Supplementary material for: Helicusin E, Isochromophilone X and Isochromophilone XI: New Chloroazaphilones Produced by the Fungus Bartalinia robillardoides Strain LF550
Source: MDPI journal article supplement (doi:10.3390/md11030800), 2013-03-12
Supplement: s5 [file s5]

marinedrugs-11-00800-s002.mol
  ChemDraw03251423422D

 24 25  0  0  0  0  0  0  0  0999 V2000
   -3.5167    0.4125    0.0000 C   0  0  0  0  0  0  0  0  0  0  0  0
   -3.5167   -0.4125    0.0000 C   0  0  0  0  0  0  0  0  0  0  0  0
   -2.8022   -0.8250    0.0000 C   0  0  0  0  0  0  0  0  0  0  0  0
   -2.0878   -0.4125    0.0000 C   0  0  0  0  0  0  0  0  0  0  0  0
   -2.0878    0.4125    0.0000 C   0  0  0  0  0  0  0  0  0  0  0  0
   -2.8022    0.8250    0.0000 C   0  0  0  0  0  0  0  0  0  0  0  0
   -1.3733   -0.8250    0.0000 C   0  0  0  0  0  0  0  0  0  0  0  0
   -0.6588   -0.4125    0.0000 O   0  0  0  0  0  0  0  0  0  0  0  0
   -0.6588    0.4125    0.0000 C   0  0  0  0  0  0  0  0  0  0  0  0
   -1.3733    0.8250    0.0000 C   0  0  0  0  0  0  0  0  0  0  0  0
    0.7701    0.4125    0.0000 C   0  0  0  0  0  0  0  0  0  0  0  0
    0.0556    0.8250    0.0000 C   0  0  0  0  0  0  0  0  0  0  0  0
    2.1990    0.4125    0.0000 C   0  0  0  0  0  0  0  0  0  0  0  0
    1.4846    0.8250    0.0000 C   0  0  0  0  0  0  0  0  0  0  0  0
    3.6280    0.4125    0.0000 C   0  0  0  0  0  0  0  0  0  0  0  0
    2.9135    0.8250    0.0000 C   0  0  0  0  0  0  0  0  0  0  0  0
   -3.7302   -1.2094    0.0000 O   0  0  0  0  0  0  0  0  0  0  0  0
   -2.8022   -1.6500    0.0000 O   0  0  0  0  0  0  0  0  0  0  0  0
   -4.2312    0.8250    0.0000 O   0  0  0  0  0  0  0  0  0  0  0  0
   -2.8022    1.6500    0.0000 Cl  0  0  0  0  0  0  0  0  0  0  0  0
   -4.3422   -0.4125    0.0000 C   0  0  0  0  0  0  0  0  0  0  0  0
    2.9122    1.6500    0.0000 C   0  0  0  0  0  0  0  0  0  0  0  0
    4.3422    0.8250    0.0000 C   0  0  0  0  0  0  0  0  0  0  0  0
    1.4836    1.6500    0.0000 C   0  0  0  0  0  0  0  0  0  0  0  0
  1  2  1  0      
  2  3  1  0      
  3  4  1  0      
  4  5  1  0      
  5  6  2  0      
  6  1  1  0      
  4  7  2  0      
  7  8  1  0      
  8  9  1  0      
  9 10  2  0      
 10  5  1  0      
 11 12  2  0      
 12  9  1  0      
 13 14  2  0      
 14 11  1  0      
 15 16  1  0      
 16 13  1  0      
  2 17  1  6      
  3 18  2  0      
  1 19  2  0      
  6 20  1  0      
  2 21  1  1      
 16 22  1  0      
 15 23  1  0      
 14 24  1  0      
M  STY  1   1 SUP
M  SLB  1   1   1
M  SAL   1  1  21
M  SBL   1  1  22
M  SMT   1 Me
M  SBV   1 22   -8.1240    4.9706
M  STY  1   2 SUP
M  SLB  1   2   2
M  SAL   2  1  22
M  SBL   2  1  23
M  SMT   2 Me
M  SBV   2 23   -7.2998    5.7956
M  STY  1   3 SUP
M  SLB  1   3   3
M  SAL   3  1  23
M  SBL   3  1  24
M  SMT   3 Me
M  SBV   3 24   -6.5842    5.3831
M  STY  1   4 SUP
M  SLB  1   4   4
M  SAL   4  1  24
M  SBL   4  1  25
M  SMT   4 Me
M  SBV   4 25   -7.2995    5.7956
M  END
