# Supplementary material for: Helicusin E, Isochromophilone X and Isochromophilone XI: New Chloroazaphilones Produced by the Fungus Bartalinia robillardoides Strain LF550
Source: MDPI journal article supplement (doi:10.3390/md11030800), 2013-03-12
Supplement: s6 [file s6]

marinedrugs-11-00800-s003.mol
  corina  04161405133D 1   1.00000     0.00000 
CORINA 3.49 0023  12.04.2013
 35 36  0  0  0  0  0  0  0  0999 V2000
    0.8321    3.0583   -1.5042 C   0  0  0  0  0  0  0  0  0  0  0  0
    0.9781    1.5672   -1.6294 C   0  0  0  0  0  0  0  0  0  0  0  0
    2.3767    1.2142   -2.0841 C   0  0  0  0  0  0  0  0  0  0  0  0
    3.4840    2.0195   -1.5625 C   0  0  0  0  0  0  0  0  0  0  0  0
    3.2003    3.4180   -1.1765 C   0  0  0  0  0  0  0  0  0  0  0  0
    1.8946    3.8922   -1.2303 C   0  0  0  0  0  0  0  0  0  0  0  0
    4.7592    1.5414   -1.4228 C   0  0  0  0  0  0  0  0  0  0  0  0
    5.7373    2.3287   -0.9687 O   0  0  0  0  0  0  0  0  0  0  0  0
    5.5172    3.6142   -0.6645 C   0  0  0  0  0  0  0  0  0  0  0  0
    4.2887    4.2042   -0.7488 C   0  0  0  0  0  0  0  0  0  0  0  0
    7.8662    3.8874   -0.1229 C   0  0  0  0  0  0  0  0  0  0  0  0
    6.6538    4.4298   -0.2173 C   0  0  0  0  0  0  0  0  0  0  0  0
   10.0989    4.7577   -0.7606 C   0  0  0  0  0  0  0  0  0  0  0  0
    9.0324    4.7244    0.3359 C   0  0  0  0  0  0  0  0  0  0  0  0
   12.4058    5.5225   -1.3399 C   0  0  0  0  0  0  0  0  0  0  0  0
   11.3475    5.4696   -0.2362 C   0  0  0  0  0  0  0  0  0  0  0  0
    0.0177    1.0697   -2.5981 O   0  0  0  0  0  0  0  0  0  0  0  0
   -1.2862    1.2868   -2.3341 C   0  0  0  0  0  0  0  0  0  0  0  0
   -1.6114    1.8758   -1.3220 O   0  0  0  0  0  0  0  0  0  0  0  0
   -3.6026    0.9127   -2.9513 C   0  0  0  0  0  0  0  0  0  0  0  0
   -2.3145    0.8113   -3.2701 C   0  0  0  0  0  0  0  0  0  0  0  0
   -4.6073   -1.5287   -2.9418 O   0  0  0  0  0  0  0  0  0  0  0  0
   -5.1010   -0.8427   -3.8053 C   0  0  0  0  0  0  0  0  0  0  0  0
   -4.6600    0.5883   -3.9748 C   0  0  0  0  0  0  0  0  0  0  0  0
   -6.0422   -1.3552   -4.6134 O   0  0  0  0  0  0  0  0  0  0  0  0
    2.5748    0.2965   -2.8529 O   0  0  0  0  0  0  0  0  0  0  0  0
   -0.2719    3.5510   -1.6563 O   0  0  0  0  0  0  0  0  0  0  0  0
    1.5949    5.5782   -0.9457 Cl  0  0  0  0  0  0  0  0  0  0  0  0
    8.5865    6.0546    0.6074 O   0  0  0  0  0  0  0  0  0  0  0  0
   10.4358    3.4213   -1.1383 O   0  0  0  0  0  0  0  0  0  0  0  0
   10.9822    6.8933    0.1888 C   0  0  0  0  0  0  0  0  0  0  0  0
    9.6274    4.1164    1.6077 C   0  0  0  0  0  0  0  0  0  0  0  0
   13.6974    6.1217   -0.7797 C   0  0  0  0  0  0  0  0  0  0  0  0
    0.7071    0.9158   -0.2718 C   0  0  0  0  0  0  0  0  0  0  0  0
   -4.0038    1.3520   -1.5667 C   0  0  0  0  0  0  0  0  0  0  0  0
  1  2  1  0      
  2  3  1  0      
  3  4  1  0      
  4  5  1  0      
  5  6  2  0      
  6  1  1  0      
  4  7  2  0      
  7  8  1  0      
  8  9  1  0      
  9 10  2  0      
 10  5  1  0      
 11 12  2  0      
 12  9  1  0      
 13 14  1  0      
 14 11  1  0      
 15 16  1  0      
 16 13  1  0      
  2 17  1  0      
 17 18  1  0      
 18 19  2  0      
 20 21  2  0      
 21 18  1  0      
 22 23  2  0      
 23 24  1  0      
 24 20  1  0      
 23 25  1  0      
  3 26  2  0      
  1 27  2  0      
  6 28  1  0      
 14 29  1  0      
 13 30  1  0      
 16 31  1  0      
 14 32  1  0      
 15 33  1  0      
  2 34  1  0      
 20 35  1  0      
M  STY  1   1 SUP
M  SLB  1   1   1
M  SAL   1  1  31
M  SBL   1  1  32
M  SMT   1 Me
M  SBV   1 32   -7.2485    7.3078
M  STY  1   2 SUP
M  SLB  1   2   2
M  SAL   2  1  32
M  SBL   2  1  33
M  SMT   2 Me
M  SBV   2 33   -6.6652    7.0672
M  STY  1   3 SUP
M  SLB  1   3   3
M  SAL   3  1  33
M  SBL   3  1  34
M  SMT   3 Me
M  SBV   3 34   -6.5330    6.8953
M  STY  1   4 SUP
M  SLB  1   4   4
M  SAL   4  1  34
M  SBL   4  1  35
M  SMT   4 Me
M  SBV   4 35   -8.0728    6.4828
M  STY  1   5 SUP
M  SLB  1   5   5
M  SAL   5  1  35
M  SBL   5  1  36
M  SMT   5 Me
M  SBV   5 36   -7.9619    6.0711
M  END
$$$$
