# Supplementary material for: Helicusin E, Isochromophilone X and Isochromophilone XI: New Chloroazaphilones Produced by the Fungus Bartalinia robillardoides Strain LF550
Source: MDPI journal article supplement (doi:10.3390/md11030800), 2013-03-12
Supplement: s8 [file s8]

marinedrugs-11-00800-s004.mol
  corina  04161405133D 1   1.00000     0.00000 
CORINA 3.49 0023  12.04.2013
 36 37  0  0  0  0  0  0  0  0999 V2000
   -0.9013    2.3752   -0.9258 C   0  0  0  0  0  0  0  0  0  0  0  0
   -1.2789    0.9182   -0.9722 C   0  0  0  0  0  0  0  0  0  0  0  0
   -0.0734    0.0779   -0.5948 C   0  0  0  0  0  0  0  0  0  0  0  0
    1.2080    0.4757   -1.1890 C   0  0  0  0  0  0  0  0  0  0  0  0
    1.4187    1.9168   -1.4391 C   0  0  0  0  0  0  0  0  0  0  0  0
    0.3794    2.8126   -1.1782 C   0  0  0  0  0  0  0  0  0  0  0  0
    2.1969   -0.4198   -1.5104 C   0  0  0  0  0  0  0  0  0  0  0  0
    3.3590    0.0228   -2.0308 N   0  0  0  0  0  0  0  0  0  0  0  0
    3.6087    1.3565   -2.2337 C   0  0  0  0  0  0  0  0  0  0  0  0
    2.6625    2.3239   -1.9479 C   0  0  0  0  0  0  0  0  0  0  0  0
    5.2063    3.0786   -2.8858 C   0  0  0  0  0  0  0  0  0  0  0  0
    4.9078    1.7654   -2.7661 C   0  0  0  0  0  0  0  0  0  0  0  0
    6.7462    4.7855   -3.6530 C   0  0  0  0  0  0  0  0  0  0  0  0
    6.4517    3.4896   -3.5349 C   0  0  0  0  0  0  0  0  0  0  0  0
    7.8060    6.0699   -5.4905 C   0  0  0  0  0  0  0  0  0  0  0  0
    8.0626    5.2073   -4.2531 C   0  0  0  0  0  0  0  0  0  0  0  0
   -1.7106    0.5715   -2.3145 O   0  0  0  0  0  0  0  0  0  0  0  0
   -2.7751    1.2368   -2.8059 C   0  0  0  0  0  0  0  0  0  0  0  0
   -3.3272    2.0833   -2.1309 O   0  0  0  0  0  0  0  0  0  0  0  0
   -4.3895    1.5043   -4.5971 C   0  0  0  0  0  0  0  0  0  0  0  0
   -3.2680    0.9384   -4.1577 C   0  0  0  0  0  0  0  0  0  0  0  0
   -6.0771   -0.4399   -5.1824 O   0  0  0  0  0  0  0  0  0  0  0  0
   -5.7588    0.1897   -6.1633 C   0  0  0  0  0  0  0  0  0  0  0  0
   -4.7993    1.3451   -6.0385 C   0  0  0  0  0  0  0  0  0  0  0  0
   -6.2597   -0.1400   -7.3642 O   0  0  0  0  0  0  0  0  0  0  0  0
   -0.1637   -0.8704    0.1573 O   0  0  0  0  0  0  0  0  0  0  0  0
   -1.7615    3.1972   -0.6601 O   0  0  0  0  0  0  0  0  0  0  0  0
    0.7101    4.5169   -1.1726 Cl  0  0  0  0  0  0  0  0  0  0  0  0
    4.3903   -0.9532   -2.3914 C   0  0  0  0  0  0  0  0  0  0  0  0
    4.1626   -1.4287   -3.8277 C   0  0  0  0  0  0  0  0  0  0  0  0
    4.3476   -0.3336   -4.7269 O   0  0  0  0  0  0  0  0  0  0  0  0
    9.1373    6.3945   -6.1709 C   0  0  0  0  0  0  0  0  0  0  0  0
    8.8567    6.0147   -3.2244 C   0  0  0  0  0  0  0  0  0  0  0  0
    7.4015    2.4492   -4.0700 C   0  0  0  0  0  0  0  0  0  0  0  0
   -2.4163    0.6532    0.0162 C   0  0  0  0  0  0  0  0  0  0  0  0
   -5.2497    2.3043   -3.6531 C   0  0  0  0  0  0  0  0  0  0  0  0
  1  2  1  0      
  2  3  1  0      
  3  4  1  0      
  4  5  1  0      
  5  6  2  0      
  6  1  1  0      
  4  7  2  0      
  7  8  1  0      
  8  9  1  0      
  9 10  2  0      
 10  5  1  0      
 11 12  2  0      
 12  9  1  0      
 13 14  2  0      
 14 11  1  0      
 15 16  1  0      
 16 13  1  0      
  2 17  1  0      
 17 18  1  0      
 18 19  2  0      
 20 21  2  0      
 21 18  1  0      
 22 23  2  0      
 23 24  1  0      
 24 20  1  0      
 23 25  1  0      
  3 26  2  0      
  1 27  2  0      
  6 28  1  0      
  8 29  1  0      
 29 30  1  0      
 30 31  1  0      
 15 32  1  0      
 16 33  1  0      
 14 34  1  0      
  2 35  1  0      
 20 36  1  0      
M  STY  1   1 SUP
M  SLB  1   1   1
M  SAL   1  1  32
M  SBL   1  1  33
M  SMT   1 Me
M  SBV   1 33   -6.7393    7.1016
M  STY  1   2 SUP
M  SLB  1   2   2
M  SAL   2  1  33
M  SBL   2  1  34
M  SMT   2 Me
M  SBV   2 34   -7.4548    7.5141
M  STY  1   3 SUP
M  SLB  1   3   3
M  SAL   3  1  34
M  SBL   3  1  35
M  SMT   3 Me
M  SBV   3 35   -7.4545    7.5141
M  STY  1   4 SUP
M  SLB  1   4   4
M  SAL   4  1  35
M  SBL   4  1  36
M  SMT   4 Me
M  SBV   4 36   -8.2790    6.6891
M  STY  1   5 SUP
M  SLB  1   5   5
M  SAL   5  1  36
M  SBL   5  1  37
M  SMT   5 Me
M  SBV   5 37   -8.1681    6.2773
M  END
$$$$
