# Supplementary material for: Helicusin E, Isochromophilone X and Isochromophilone XI: New Chloroazaphilones Produced by the Fungus Bartalinia robillardoides Strain LF550
Source: MDPI journal article supplement (doi:10.3390/md11030800), 2013-03-12
Supplement: s9 [file s9]

marinedrugs-11-00800-s004.mol
  ChemDraw03251423432D

 36 37  0  0  0  0  0  0  0  0999 V2000
   -3.4655    2.0484    0.0000 C   0  0  0  0  0  0  0  0  0  0  0  0
   -3.4655    1.2234    0.0000 C   0  0  0  0  0  0  0  0  0  0  0  0
   -2.7510    0.8109    0.0000 C   0  0  0  0  0  0  0  0  0  0  0  0
   -2.0365    1.2234    0.0000 C   0  0  0  0  0  0  0  0  0  0  0  0
   -2.0365    2.0484    0.0000 C   0  0  0  0  0  0  0  0  0  0  0  0
   -2.7510    2.4609    0.0000 C   0  0  0  0  0  0  0  0  0  0  0  0
   -1.3221    0.8109    0.0000 C   0  0  0  0  0  0  0  0  0  0  0  0
   -0.6076    1.2234    0.0000 N   0  0  0  0  0  0  0  0  0  0  0  0
   -0.6076    2.0484    0.0000 C   0  0  0  0  0  0  0  0  0  0  0  0
   -1.3221    2.4609    0.0000 C   0  0  0  0  0  0  0  0  0  0  0  0
    0.8213    2.0484    0.0000 C   0  0  0  0  0  0  0  0  0  0  0  0
    0.1069    2.4609    0.0000 C   0  0  0  0  0  0  0  0  0  0  0  0
    2.2503    2.0484    0.0000 C   0  0  0  0  0  0  0  0  0  0  0  0
    1.5358    2.4609    0.0000 C   0  0  0  0  0  0  0  0  0  0  0  0
    3.6792    2.0484    0.0000 C   0  0  0  0  0  0  0  0  0  0  0  0
    2.9648    2.4609    0.0000 C   0  0  0  0  0  0  0  0  0  0  0  0
   -3.6790    0.4266    0.0000 O   0  0  0  0  0  0  0  0  0  0  0  0
   -3.6790   -0.3984    0.0000 C   0  0  0  0  0  0  0  0  0  0  0  0
   -4.3935   -0.8109    0.0000 O   0  0  0  0  0  0  0  0  0  0  0  0
   -2.9645   -1.6359    0.0000 C   0  0  0  0  0  0  0  0  0  0  0  0
   -2.9645   -0.8109    0.0000 C   0  0  0  0  0  0  0  0  0  0  0  0
   -2.9645   -3.2859    0.0000 O   0  0  0  0  0  0  0  0  0  0  0  0
   -2.2501   -2.8734    0.0000 C   0  0  0  0  0  0  0  0  0  0  0  0
   -2.2501   -2.0484    0.0000 C   0  0  0  0  0  0  0  0  0  0  0  0
   -1.5356   -3.2859    0.0000 O   0  0  0  0  0  0  0  0  0  0  0  0
   -2.7510   -0.0141    0.0000 O   0  0  0  0  0  0  0  0  0  0  0  0
   -4.1800    2.4609    0.0000 O   0  0  0  0  0  0  0  0  0  0  0  0
   -2.7510    3.2859    0.0000 Cl  0  0  0  0  0  0  0  0  0  0  0  0
    0.1069    0.8109    0.0000 C   0  0  0  0  0  0  0  0  0  0  0  0
    0.1069   -0.0141    0.0000 C   0  0  0  0  0  0  0  0  0  0  0  0
    0.8213   -0.4266    0.0000 O   0  0  0  0  0  0  0  0  0  0  0  0
    4.3935    2.4609    0.0000 C   0  0  0  0  0  0  0  0  0  0  0  0
    2.9635    3.2859    0.0000 C   0  0  0  0  0  0  0  0  0  0  0  0
    1.5349    3.2859    0.0000 C   0  0  0  0  0  0  0  0  0  0  0  0
   -4.2910    1.2234    0.0000 C   0  0  0  0  0  0  0  0  0  0  0  0
   -3.6791   -2.0477    0.0000 C   0  0  0  0  0  0  0  0  0  0  0  0
  1  2  1  0      
  2  3  1  0      
  3  4  1  0      
  4  5  1  0      
  5  6  2  0      
  6  1  1  0      
  4  7  2  0      
  7  8  1  0      
  8  9  1  0      
  9 10  2  0      
 10  5  1  0      
 11 12  2  0      
 12  9  1  0      
 13 14  2  0      
 14 11  1  0      
 15 16  1  0      
 16 13  1  0      
  2 17  1  6      
 17 18  1  0      
 18 19  2  0      
 20 21  2  0      
 21 18  1  0      
 22 23  2  0      
 23 24  1  0      
 24 20  1  0      
 23 25  1  0      
  3 26  2  0      
  1 27  2  0      
  6 28  1  0      
  8 29  1  0      
 29 30  1  0      
 30 31  1  0      
 15 32  1  0      
 16 33  1  0      
 14 34  1  0      
  2 35  1  1      
 20 36  1  0      
M  STY  1   1 SUP
M  SLB  1   1   1
M  SAL   1  1  32
M  SBL   1  1  33
M  SMT   1 Me
M  SBV   1 33   -6.7393    7.1016
M  STY  1   2 SUP
M  SLB  1   2   2
M  SAL   2  1  33
M  SBL   2  1  34
M  SMT   2 Me
M  SBV   2 34   -7.4548    7.5141
M  STY  1   3 SUP
M  SLB  1   3   3
M  SAL   3  1  34
M  SBL   3  1  35
M  SMT   3 Me
M  SBV   3 35   -7.4545    7.5141
M  STY  1   4 SUP
M  SLB  1   4   4
M  SAL   4  1  35
M  SBL   4  1  36
M  SMT   4 Me
M  SBV   4 36   -8.2790    6.6891
M  STY  1   5 SUP
M  SLB  1   5   5
M  SAL   5  1  36
M  SBL   5  1  37
M  SMT   5 Me
M  SBV   5 37   -8.1681    6.2773
M  END
