# Supplementary material for: Helicusin E, Isochromophilone X and Isochromophilone XI: New Chloroazaphilones Produced by the Fungus Bartalinia robillardoides Strain LF550
Source: MDPI journal article supplement (doi:10.3390/md11030800), 2013-03-12
Supplement: s10 [file s10]

marinedrugs-11-00800-s005.mol
  corina  04161405133D 1   1.00000     0.00000 
CORINA 3.49 0023  12.04.2013
 34 35  0  0  0  0  0  0  0  0999 V2000
   -0.1354    0.0735    0.4172 C   0  0  0  0  0  0  0  0  0  0  0  0
    0.1413   -1.3742    0.1007 C   0  0  0  0  0  0  0  0  0  0  0  0
    1.6393   -1.5506   -0.0551 C   0  0  0  0  0  0  0  0  0  0  0  0
    2.3518   -0.5667   -0.9541 C   0  0  0  0  0  0  0  0  0  0  0  0
    1.9760    0.8307   -0.5204 C   0  0  0  0  0  0  0  0  0  0  0  0
    0.7730    1.0749    0.0987 C   0  0  0  0  0  0  0  0  0  0  0  0
    3.8678   -0.7282   -0.8216 C   0  0  0  0  0  0  0  0  0  0  0  0
    4.4959    0.3227   -1.5677 O   0  0  0  0  0  0  0  0  0  0  0  0
    4.1387    1.5907   -1.2568 C   0  0  0  0  0  0  0  0  0  0  0  0
    2.8927    1.8660   -0.7231 C   0  0  0  0  0  0  0  0  0  0  0  0
    6.2740    2.3867   -2.0033 C   0  0  0  0  0  0  0  0  0  0  0  0
    5.0503    2.6467   -1.4804 C   0  0  0  0  0  0  0  0  0  0  0  0
    8.4224    3.2230   -2.7497 C   0  0  0  0  0  0  0  0  0  0  0  0
    7.2171    3.4791   -2.2346 C   0  0  0  0  0  0  0  0  0  0  0  0
   10.6521    4.1784   -2.2349 C   0  0  0  0  0  0  0  0  0  0  0  0
    9.3696    4.3559   -3.0502 C   0  0  0  0  0  0  0  0  0  0  0  0
   -0.3399   -2.2126    1.1841 O   0  0  0  0  0  0  0  0  0  0  0  0
   -1.6567   -2.1519    1.4663 C   0  0  0  0  0  0  0  0  0  0  0  0
   -2.3826   -1.4184    0.8244 O   0  0  0  0  0  0  0  0  0  0  0  0
   -3.4841   -2.8167    2.9172 C   0  0  0  0  0  0  0  0  0  0  0  0
   -2.2144   -2.9727    2.5502 C   0  0  0  0  0  0  0  0  0  0  0  0
   -3.4890   -2.1201    5.4638 O   0  0  0  0  0  0  0  0  0  0  0  0
   -4.0100   -3.1965    5.2910 C   0  0  0  0  0  0  0  0  0  0  0  0
   -4.1067   -3.7726    3.9019 C   0  0  0  0  0  0  0  0  0  0  0  0
   -4.5027   -3.8791    6.3365 O   0  0  0  0  0  0  0  0  0  0  0  0
    2.2346   -2.4348    0.5124 O   0  0  0  0  0  0  0  0  0  0  0  0
   -1.1822    0.3726    0.9605 O   0  0  0  0  0  0  0  0  0  0  0  0
    0.3697    2.7145    0.5020 Cl  0  0  0  0  0  0  0  0  0  0  0  0
    1.9489   -0.7745   -2.3093 O   0  0  0  0  0  0  0  0  0  0  0  0
   11.5614    5.3910   -2.4441 C   0  0  0  0  0  0  0  0  0  0  0  0
   -0.5616   -1.7605   -1.2023 C   0  0  0  0  0  0  0  0  0  0  0  0
   -4.2992   -1.6842    2.3480 C   0  0  0  0  0  0  0  0  0  0  0  0
    9.7094    4.3544   -4.5420 C   0  0  0  0  0  0  0  0  0  0  0  0
    6.8294    4.8945   -1.8920 C   0  0  0  0  0  0  0  0  0  0  0  0
  1  2  1  0      
  2  3  1  0      
  3  4  1  0      
  4  5  1  0      
  5  6  2  0      
  6  1  1  0      
  4  7  1  0      
  7  8  1  0      
  8  9  1  0      
  9 10  2  0      
 10  5  1  0      
 11 12  2  0      
 12  9  1  0      
 13 14  2  0      
 14 11  1  0      
 15 16  1  0      
 16 13  1  0      
 17 18  1  0      
 18 19  2  0      
 20 21  2  0      
 21 18  1  0      
 22 23  2  0      
 23 24  1  0      
 24 20  1  0      
 23 25  1  0      
  3 26  2  0      
  1 27  2  0      
  6 28  1  0      
  4 29  1  0      
  2 17  1  0      
 15 30  1  0      
  2 31  1  0      
 20 32  1  0      
 16 33  1  0      
 14 34  1  0      
M  STY  1   1 SUP
M  SLB  1   1   1
M  SAL   1  1  30
M  SBL   1  1  31
M  SMT   1 Me
M  SBV   1 31   -6.8424    7.1016
M  STY  1   2 SUP
M  SLB  1   2   2
M  SAL   2  1  31
M  SBL   2  1  32
M  SMT   2 Me
M  SBV   2 32   -8.3822    6.6891
M  STY  1   3 SUP
M  SLB  1   3   3
M  SAL   3  1  32
M  SBL   3  1  33
M  SMT   3 Me
M  SBV   3 33   -8.2712    6.2773
M  STY  1   4 SUP
M  SLB  1   4   4
M  SAL   4  1  33
M  SBL   4  1  34
M  SMT   4 Me
M  SBV   4 34   -7.5579    7.5141
M  STY  1   5 SUP
M  SLB  1   5   5
M  SAL   5  1  34
M  SBL   5  1  35
M  SMT   5 Me
M  SBV   5 35   -7.5576    7.5141
M  END
$$$$
