# Supplementary material for: Helicusin E, Isochromophilone X and Isochromophilone XI: New Chloroazaphilones Produced by the Fungus Bartalinia robillardoides Strain LF550
Source: MDPI journal article supplement (doi:10.3390/md11030800), 2013-03-12
Supplement: s12 [file s12]

marinedrugs-11-00800-s006.mol
  corina  04161405133D 1   1.00000     0.00000 
CORINA 3.49 0023  12.04.2013
 21 21  0  0  0  0  0  0  0  0999 V2000
   -0.0187    1.5258    0.0104 C   0  0  0  0  0  0  0  0  0  0  0  0
    0.0021   -0.0041    0.0020 C   0  0  0  0  0  0  0  0  0  0  0  0
   -0.2641   -0.5178    1.3935 C   0  0  0  0  0  0  0  0  0  0  0  0
    0.6585   -1.5379    2.0094 C   0  0  0  0  0  0  0  0  0  0  0  0
    2.0816    1.6761    1.2334 O   0  0  0  0  0  0  0  0  0  0  0  0
    1.4167    2.0554   -0.0004 C   0  0  0  0  0  0  0  0  0  0  0  0
    1.4341   -0.8948    3.1608 C   0  0  0  0  0  0  0  0  0  0  0  0
    2.9319   -1.1391    2.9660 C   0  0  0  0  0  0  0  0  0  0  0  0
    3.5913    0.1350    2.4341 C   0  0  0  0  0  0  0  0  0  0  0  0
    2.8716    0.5917    1.1913 C   0  0  0  0  0  0  0  0  0  0  0  0
    1.3427   -1.6487   -1.0937 C   0  0  0  0  0  0  0  0  0  0  0  0
    1.3035   -0.4680   -0.4444 O   0  0  0  0  0  0  0  0  0  0  0  0
    2.6641   -3.3463   -2.2154 C   0  0  0  0  0  0  0  0  0  0  0  0
    2.6254   -2.1806   -1.5745 C   0  0  0  0  0  0  0  0  0  0  0  0
    0.3171   -2.2732   -1.2815 O   0  0  0  0  0  0  0  0  0  0  0  0
   -1.2165   -0.1119    2.0151 O   0  0  0  0  0  0  0  0  0  0  0  0
    3.0053   -0.0185    0.1571 O   0  0  0  0  0  0  0  0  0  0  0  0
    1.0144   -1.4720    4.3988 O   0  0  0  0  0  0  0  0  0  0  0  0
   -0.7675   -0.3741   -0.6754 H   0  0  0  0  0  0  0  0  0  0  0  0
    1.3968    3.5805   -0.1211 C   0  0  0  0  0  0  0  0  0  0  0  0
    3.9795   -3.8918   -2.7085 C   0  0  0  0  0  0  0  0  0  0  0  0
  1  2  1  0      
  2  3  1  0      
  3  4  1  0      
  5  6  1  0      
  6  1  1  0      
  4  7  1  0      
  7  8  1  0      
  8  9  1  0      
  9 10  1  0      
 10  5  1  0      
 11 12  1  0      
 12  2  1  0      
 13 14  2  0      
 14 11  1  0      
 11 15  2  0      
  3 16  2  0      
 10 17  2  0      
  7 18  1  0      
  2 19  1  0      
  6 20  1  0      
 13 21  1  0      
M  STY  1   1 SUP
M  SLB  1   1   1
M  SAL   1  1  20
M  SBL   1  1  20
M  SMT   1 Me
M  SBV   1 20   -7.0750    5.9813
M  STY  1   2 SUP
M  SLB  1   2   2
M  SAL   2  1  21
M  SBL   2  1  21
M  SMT   2 Me
M  SBV   2 21   -7.7899    4.7438
M  END
$$$$
