# Supplementary material for: Helicusin E, Isochromophilone X and Isochromophilone XI: New Chloroazaphilones Produced by the Fungus Bartalinia robillardoides Strain LF550
Source: MDPI journal article supplement (doi:10.3390/md11030800), 2013-03-12
Supplement: s13 [file s13]

marinedrugs-11-00800-s006.mol
  ChemDraw03251423442D

 21 21  0  0  0  0  0  0  0  0999 V2000
    0.3574    0.4125    0.0000 C   0  0  0  0  0  0  0  0  0  0  0  0
    0.3574   -0.4125    0.0000 C   0  0  0  0  0  0  0  0  0  0  0  0
    1.0719   -0.8250    0.0000 C   0  0  0  0  0  0  0  0  0  0  0  0
    1.7864   -0.4125    0.0000 C   0  0  0  0  0  0  0  0  0  0  0  0
    1.7864    0.4125    0.0000 O   0  0  0  0  0  0  0  0  0  0  0  0
    1.0719    0.8250    0.0000 C   0  0  0  0  0  0  0  0  0  0  0  0
    2.5009   -0.8250    0.0000 C   0  0  0  0  0  0  0  0  0  0  0  0
    3.2153   -0.4125    0.0000 C   0  0  0  0  0  0  0  0  0  0  0  0
    3.2153    0.4125    0.0000 C   0  0  0  0  0  0  0  0  0  0  0  0
    2.5009    0.8250    0.0000 C   0  0  0  0  0  0  0  0  0  0  0  0
   -1.0715   -0.4125    0.0000 C   0  0  0  0  0  0  0  0  0  0  0  0
   -0.3570   -0.8250    0.0000 O   0  0  0  0  0  0  0  0  0  0  0  0
   -2.5004   -0.4125    0.0000 C   0  0  0  0  0  0  0  0  0  0  0  0
   -1.7860   -0.8250    0.0000 C   0  0  0  0  0  0  0  0  0  0  0  0
   -1.0715    0.4125    0.0000 O   0  0  0  0  0  0  0  0  0  0  0  0
    1.0719   -1.6500    0.0000 O   0  0  0  0  0  0  0  0  0  0  0  0
    2.5009    1.6500    0.0000 O   0  0  0  0  0  0  0  0  0  0  0  0
    2.5009   -1.6500    0.0000 O   0  0  0  0  0  0  0  0  0  0  0  0
    0.3574   -1.2375    0.0000 H   0  0  0  0  0  0  0  0  0  0  0  0
    1.0719    1.6500    0.0000 C   0  0  0  0  0  0  0  0  0  0  0  0
   -3.2153   -0.8250    0.0000 C   0  0  0  0  0  0  0  0  0  0  0  0
  1  2  1  0      
  2  3  1  0      
  3  4  1  0      
  5  6  1  0      
  6  1  1  0      
  4  7  1  0      
  7  8  1  0      
  8  9  1  0      
  9 10  1  0      
 10  5  1  0      
 11 12  1  0      
 12  2  1  0      
 13 14  2  0      
 14 11  1  0      
 11 15  2  0      
  3 16  2  0      
 10 17  2  0      
  7 18  1  6      
  2 19  1  1      
  6 20  1  1      
 13 21  1  0      
M  STY  1   1 SUP
M  SLB  1   1   1
M  SAL   1  1  20
M  SBL   1  1  20
M  SMT   1 Me
M  SBV   1 20   -7.0750    5.9813
M  STY  1   2 SUP
M  SLB  1   2   2
M  SAL   2  1  21
M  SBL   2  1  21
M  SMT   2 Me
M  SBV   2 21   -7.7899    4.7438
M  END
